# Supplementary material for: ZEAL: protein structure alignment based on shape similarity
Source: PubMed Central journal article supplement — Bioinformatics. 2021 Mar 27;37(18):2874–81. doi: 10.1093/bioinformatics/btab205 (PMC10262298; doi:10.1093/bioinformatics/btab205), 2021-03-27
Supplement: btab205_supplementary_data.pdf [file btab205_supplementary_data.pdf]

## Supplementary information

### **ZEAL: Protein structure alignment based on shape similarity**

Filip Ljung and Ingemar André

*Division of Biochemistry and Structural Biology, Department of Chemistry, Lund  
University,*

*POB 124, SE-22100 Lund, Sweden*

March 23, 2021

## S1. Molecular surfaces from EDT

Our algorithm to generate molecular surfaces using the EDT deviates slightly from that by Xu and Zhang[6], and we therefore outline the main steps below with the corresponding results shown in Figure S1 after each step.

1. **Step 1.** Scale and translate all atoms to fit inside a bounding box with side length  $L$  and with integer coordinates (voxels). The resolution of this grid is thus  $L^3$  voxels. After this scaling, the vdW radii  $r_i$  and solvent probe radius  $r_p$  becomes  $sr_i$  and  $sr_p$  voxels.
2. **Step 2.** Create a solvent-accessible (SA) solid by assigning voxels a value of 1 if they are within  $sr_i + sr_p$  for each atom, or 0 otherwise. While not performed in the work presented here, any cavities in the SA solid can be removed using a flood-fill operation on background voxels; the cavities are those voxels that cannot be reached by filling in the background from the sides of the box.
3. **Step 3.** Create the molecular surface (MS) by keeping voxels at the boundary (perimeter) of the SA solid. A voxel is part of the perimeter if it is non-zero and it is connected to at least one non-zero valued voxel within a 6-connected neighbourhood (i.e. voxel faces touch). The perimeter is found by comparing the SA solid and its image-eroded version using the connectivity neighbourhood. The vdW surface is obtained by setting  $r_p = 0$  in step 2.
4. **Step 4.** Map voxels inside the MS by using a flood-fill operation on background pixels.
5. **Step 5.** Perform a Euclidean distance transform (EDT) to generate the Euclidean distance map (EDM) for the MS.
6. **Step 6.** Change the sign for EDM-values belonging to interior voxels mapped in step (4). This is the signed EDM (sEDM).
7. **Step 7.** Generate the (voxelized) molecular surface by extracting the isosurface from the sEDM with isovalues equal to  $-sr_p$ .

The vdW radii are taken from Bondi[1] and, by default, the probe radius  $r_p$  is set to 1.4 Å. The EDT method integrates naturally with the Novotni and Klein algorithm[4] for ZC moment computations as the molecular surface is mapped to a grid directly. The surface sampling resolution and shell thickness, both affecting the performance of the shape representation in ZC space, can easily be controlled by specifying the grid size  $L$  (sampling resolution) the range of isovalues in the vicinity of  $-sr_p$  (shell thickness). In the work presented here, we use a  $64^3$  grid and a thickness of 2 voxels for the molecular surface.

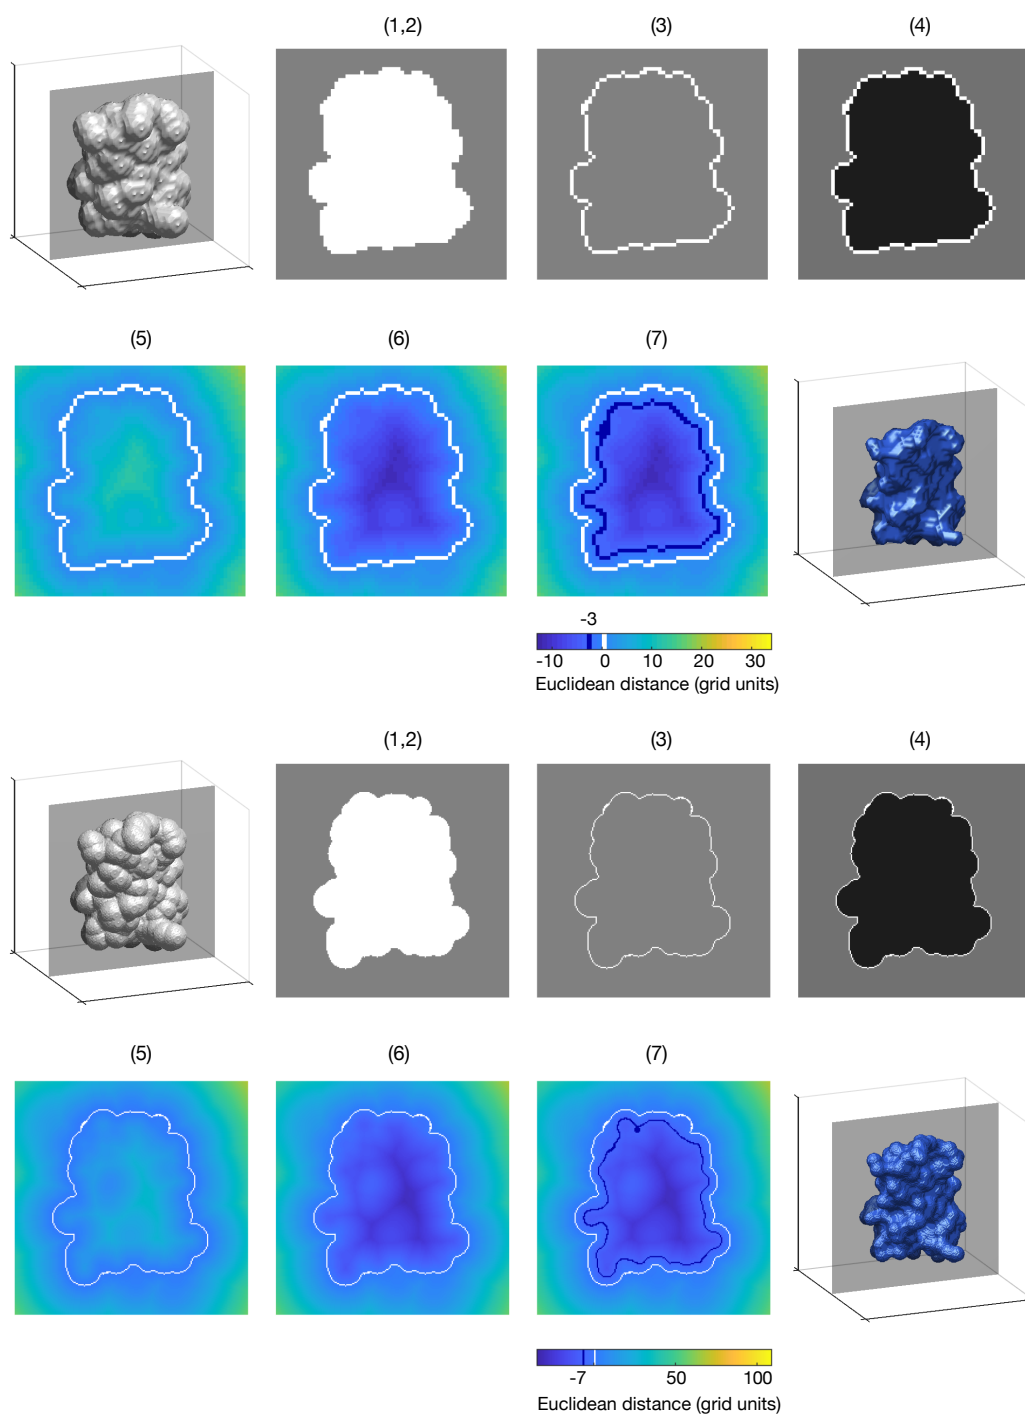

**Figure S1.** Steps 1-7 for computing the molecular surface using the Euclidean distance transform (EDT) on a  $64^3$  (above) and  $200^3$  (below) grid for BPTI (PDB ID code 5PTI)

## S2. Shape alignment

Figure S2 shows the ZEAL score (A) and RMSD (B) landscape for the self-alignment of a rotated copy of 1B3T on a 2D search grid where the correct alignment is located.

We benchmark the robustness of the surrogate optimization algorithm implemented in ZEAL by performing self-alignment trials of five protein structures. Each structure is randomly rotated, over all possible Euler angles, and then aligned to an un-rotated copy using 1000 function evaluations with default settings (expansion order of 20;  $64^3$  grid; molecular surface representation and scaling factor  $s = 0.7R_{\max}$ ). Table S1 below shows statistics for the heavy-atom RMSD before and after the search for each structure. In all cases, the resulting RMSD is close to zero and we conclude that the algorithm is very likely to find the correct alignment.

Figure S3 A-D and figure S2 C show how the score correlates with RMSD for the five structures when one copy is systematically rotated over a dense grid of all possible Euler angles. For high scores, typically above 0.8, there is a strong linear correlation between the ZEAL score and RMSD.

**Table S1. Self-alignment benchmark**

| ID+chain | RMSD before search ( $\text{\AA}$ ) | RMSD after search ( $\text{\AA}$ ) |
|----------|-------------------------------------|------------------------------------|
| 1B3TA    | $23.2 \pm 9.71$                     | $0.024 \pm 0.025$                  |
| 3A8GA    | $27.9 \pm 5.41$                     | $0.058 \pm 0.123$                  |
| 5MOKA    | $24.8 \pm 8.23$                     | $0.030 \pm 0.025$                  |
| 2B3JA    | $14.9 \pm 2.92$                     | $0.017 \pm 0.013$                  |
| 4G9SB    | $20.7 \pm 3.24$                     | $0.036 \pm 0.032$                  |

Mean ( $\pm$  standard deviation) heavy-atom RMSD for the self-alignment of five structures (PDB ID code + chain ID code) before and after ZEAL-alignment. Statistics refer to 20 random rotations and the search was stopped after 1000 function evaluations using default settings.

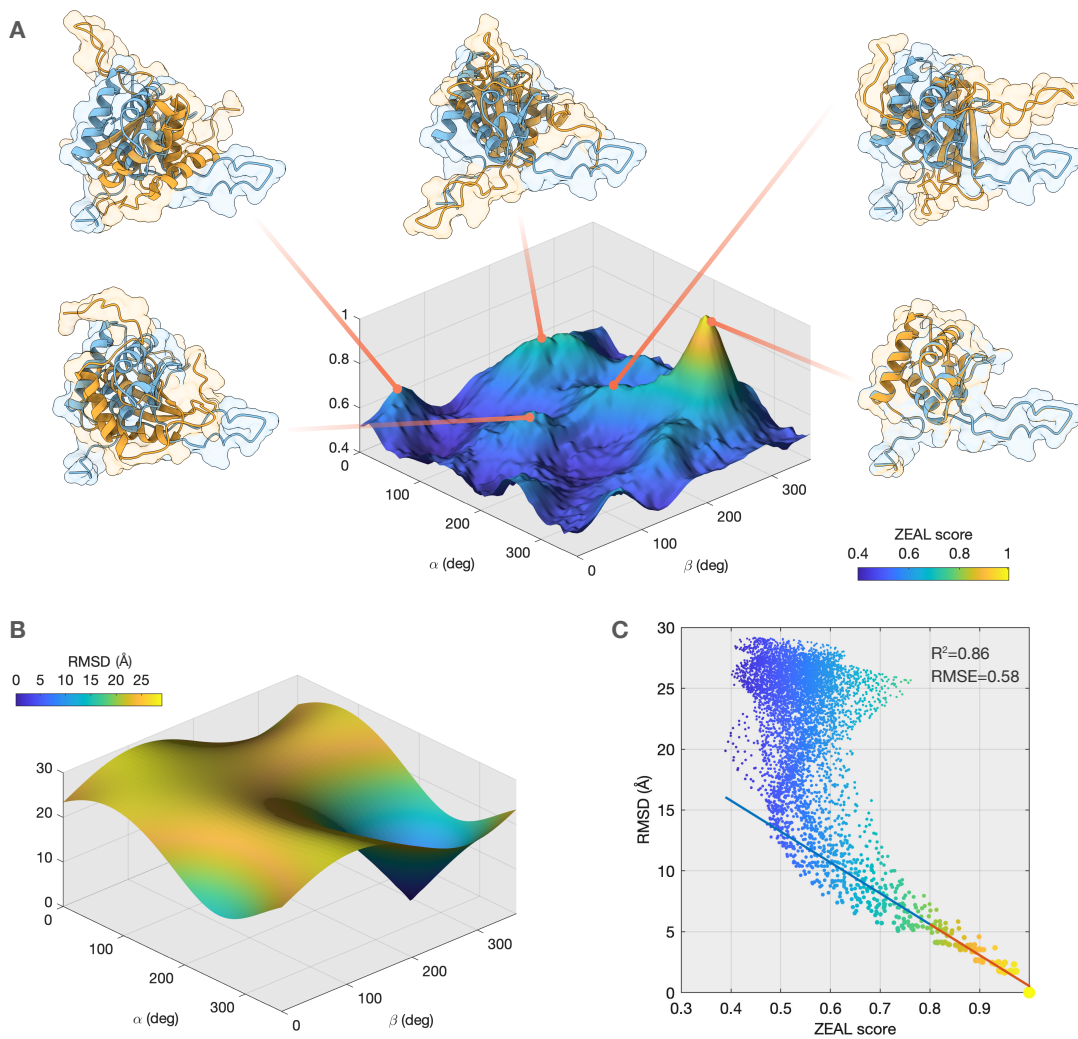

**Figure S2.** Self-alignment of EBNA1 nuclear protein (PDB ID code 1B3T) on a 2D search grid over Euler angles  $\alpha$  and  $\beta$  (xyz convention). (A) Cross section through the 3D correlation-function landscape (ZEAL score) and (B) the heavy-atom RMSD. (C) The correlation between ZEAL score and RMSD with a linear model fitted for ZEAL scores  $> 0.8$  (red line). The adjusted R square and root mean square error (RMSE) are given in the figure.

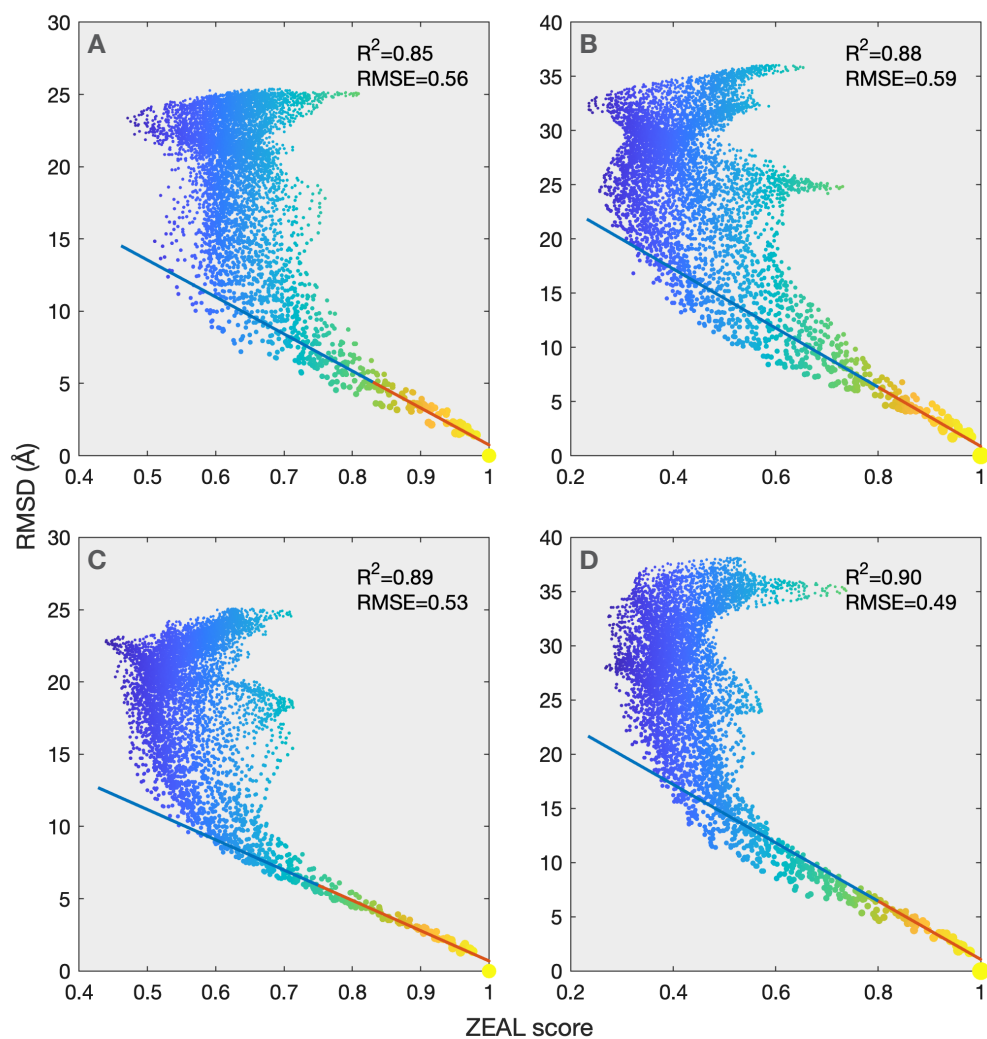

**Figure S3.** The correlation between ZEAL score and RMSD for the self-alignment of (A) 3A8GA, (B) 5MOKA (C) 2B3JA and (D) 4G9SB. The size of data points are scaled by the inverse RMSD and coloured by score. The red part of the line represent data that was used to create a linear fit, with the adjusted  $R^2$  and root mean square error (RMSE) presented in each figure.

### S3. Benchmark analysis

Table S2 lists the settings used for molecular matching in HEX version 8.0.0. Table S3 and S4 lists the two sets of structures (100 pairs in each) used for the benchmark analysis. All pairs have a Euclidean ZC shape descriptor distance  $d_E < 0.025$ , and a chain-length (length) and radius of gyration (Rg) difference  $< 10\%$ . Pairs in the high TM-score set (table S3) have TM-scores  $> 0.9$ , and pairs in the low TM-score set have TM-scores  $< 0.3$  (table S4).

**Table S2. Settings for molecular matching in HEX version 8.0.0.**

|                         |              |                  |     |
|-------------------------|--------------|------------------|-----|
| <b>Correlation Type</b> | Shape        |                  |     |
| <b>Compute Device</b>   | CPU          |                  |     |
| <b>FFT Mode</b>         | 3D           |                  |     |
| <b>Sampling Method</b>  | Receptor Box |                  |     |
| <b>Grid Dimension</b>   | 0.6          | <b>Solutions</b> | 10  |
| <b>Receptor Range</b>   | 180          | <b>Step Size</b> | 20  |
| <b>Ligand Range</b>     | 180          | <b>Step Size</b> | 10  |
| <b>Twist Range</b>      | 360          | <b>Step Size</b> | 5.5 |
| <b>Distance Range</b>   | 6            | <b>Box Size</b>  | 6   |
| <b>Scan Step</b>        | 0.8          | <b>SubSteps</b>  | 0   |
| <b>Steric Scan</b>      | 3            |                  |     |
| <b>Search Order</b>     | 10           |                  |     |

**Table S3: Protein structures in the high TM-score benchmark set**

| pair | ID+chain | ID+chain | length | length | Rg    | Rg    | aligned | seq.id | RMSD | TM <sub>s</sub> | TM <sub>s</sub> | $d_E$ |
|------|----------|----------|--------|--------|-------|-------|---------|--------|------|-----------------|-----------------|-------|
| No   | A        | B        | A      | B      | A (Å) | B (Å) | length  | (%)    | (Å)  | A               | B               |       |
| 1    | 3UNVA    | 2QVEA    | 513    | 525    | 27.4  | 27.6  | 507     | 37.7   | 1.50 | 0.96            | 0.94            | 0.021 |
| 2    | 3HNYM    | 1CZTA    | 156    | 160    | 14.6  | 15.3  | 156     | 42.3   | 0.86 | 0.98            | 0.95            | 0.014 |
| 3    | 5NZBA    | 4ESPA    | 132    | 130    | 13.8  | 13.6  | 129     | 72.9   | 1.77 | 0.91            | 0.93            | 0.021 |
| 4    | 3H7RA    | 1ZGDA    | 307    | 308    | 19.0  | 18.7  | 296     | 40.9   | 1.51 | 0.93            | 0.92            | 0.024 |
| 5    | 3HGJA    | 1Z41A    | 348    | 327    | 19.5  | 19.4  | 326     | 50.9   | 1.09 | 0.92            | 0.97            | 0.021 |
| 6    | 4DI0A    | 1J30A    | 139    | 141    | 18.2  | 18.2  | 138     | 60.9   | 1.03 | 0.96            | 0.94            | 0.015 |
| 7    | 4M8SA    | 1CYDA    | 247    | 242    | 17.7  | 17.5  | 239     | 30.5   | 1.80 | 0.90            | 0.92            | 0.023 |
| 8    | 4K7XA    | 4JCIA    | 314    | 312    | 19.3  | 20.0  | 312     | 65.4   | 1.95 | 0.92            | 0.93            | 0.017 |
| 9    | 6NIBA    | 3H7CX    | 345    | 362    | 18.8  | 19.3  | 339     | 74.6   | 0.73 | 0.97            | 0.93            | 0.024 |
| 10   | 4G9SB    | 4DY5A    | 111    | 111    | 14.0  | 13.8  | 111     | 82.9   | 1.03 | 0.95            | 0.95            | 0.021 |
| 11   | 1CG5A    | 2W72A    | 141    | 141    | 14.9  | 14.8  | 140     | 42.1   | 1.24 | 0.93            | 0.93            | 0.023 |
| 12   | 4Q7ZA    | 6QFEA    | 233    | 227    | 16.7  | 16.6  | 224     | 33.0   | 1.25 | 0.92            | 0.95            | 0.024 |
| 13   | 4MVAA    | 3TA6A    | 255    | 255    | 17.5  | 17.6  | 250     | 41.6   | 1.24 | 0.94            | 0.94            | 0.021 |
| 14   | 5G6RA    | 4OQZA    | 288    | 283    | 23.6  | 23.2  | 282     | 28.4   | 1.26 | 0.94            | 0.96            | 0.024 |
| 15   | 1KGCD    | 6BJ8D    | 201    | 201    | 21.8  | 21.4  | 197     | 64.0   | 1.75 | 0.91            | 0.91            | 0.022 |
| 16   | 2GJDA    | 6GV3A    | 155    | 156    | 16.1  | 16.0  | 155     | 58.7   | 0.77 | 0.98            | 0.97            | 0.018 |
| 17   | 3GFVA    | 5AD1A    | 282    | 290    | 19.9  | 19.7  | 274     | 42.3   | 1.29 | 0.94            | 0.91            | 0.023 |
| 18   | 2EA3A    | 2PFEB    | 183    | 186    | 14.4  | 14.6  | 182     | 57.7   | 0.77 | 0.98            | 0.96            | 0.016 |
| 19   | 6JK4A    | 2PY2A    | 126    | 127    | 13.5  | 13.4  | 125     | 83.2   | 0.45 | 0.98            | 0.97            | 0.024 |
| 20   | 1MNGA    | 6EX5A    | 198    | 198    | 16.7  | 16.6  | 192     | 49.5   | 1.05 | 0.93            | 0.93            | 0.021 |
| 21   | 3BRSA    | 3KSMA    | 271    | 272    | 19.4  | 19.5  | 264     | 24.2   | 1.81 | 0.92            | 0.91            | 0.024 |
| 22   | 1O91A    | 6U66A    | 131    | 136    | 14.6  | 15.3  | 131     | 42.0   | 1.17 | 0.94            | 0.91            | 0.019 |
| 23   | 3V3WA    | 3QKEA    | 397    | 397    | 20.8  | 20.8  | 397     | 72.5   | 0.57 | 1.00            | 1.00            | 0.019 |
| 24   | 3F6DA    | 5F0GA    | 218    | 207    | 17.2  | 17.0  | 204     | 54.9   | 1.09 | 0.91            | 0.95            | 0.024 |
| 25   | 3RGKA    | 5YCEA    | 149    | 151    | 15.1  | 15.0  | 149     | 85.9   | 0.63 | 0.98            | 0.97            | 0.022 |
| 26   | 1NFJA    | 2BKYA    | 87     | 89     | 14.2  | 14.9  | 87      | 60.9   | 1.30 | 0.93            | 0.91            | 0.021 |
| 27   | 3WPCA    | 3WPFA    | 747    | 740    | 31.4  | 31.6  | 736     | 72.0   | 1.42 | 0.97            | 0.98            | 0.013 |
| 28   | 1PBYA    | 1JMXA    | 489    | 493    | 25.2  | 25.2  | 480     | 40.2   | 1.72 | 0.94            | 0.94            | 0.023 |
| 29   | 4XV0A    | 1I1WA    | 301    | 302    | 18.4  | 18.2  | 301     | 64.5   | 0.62 | 0.99            | 0.99            | 0.017 |
| 30   | 4M9DA    | 3HIDA    | 417    | 424    | 22.0  | 22.4  | 409     | 46.7   | 1.70 | 0.94            | 0.92            | 0.021 |
| 31   | 3GZBF    | 3LZAD    | 130    | 133    | 14.9  | 15.1  | 129     | 72.1   | 0.65 | 0.97            | 0.95            | 0.021 |
| 32   | 3H81A    | 2PBPA    | 256    | 255    | 19.4  | 19.7  | 255     | 45.5   | 1.11 | 0.96            | 0.97            | 0.020 |
| 33   | 3AV3A    | 3P9XA    | 184    | 195    | 16.3  | 16.7  | 183     | 60.7   | 0.99 | 0.96            | 0.91            | 0.025 |
| 34   | 5XVJA    | 5Y53A    | 134    | 132    | 15.6  | 15.4  | 130     | 76.2   | 1.31 | 0.92            | 0.93            | 0.016 |
| 35   | 3HH8A    | 5JPDA    | 280    | 275    | 18.9  | 19.1  | 271     | 53.1   | 1.14 | 0.94            | 0.96            | 0.025 |
| 36   | 4AOHA    | 1AGIA    | 122    | 125    | 14.5  | 14.7  | 122     | 65.6   | 1.34 | 0.96            | 0.94            | 0.023 |
| 37   | 3OP4A    | 2PNFA    | 235    | 248    | 17.5  | 17.8  | 235     | 51.1   | 1.47 | 0.95            | 0.90            | 0.025 |
| 38   | 4FCUA    | 1VICA    | 253    | 255    | 18.9  | 19.0  | 251     | 42.2   | 1.67 | 0.94            | 0.93            | 0.016 |
| 39   | 3A8GA    | 4OB0A    | 195    | 202    | 19.3  | 19.5  | 193     | 42.5   | 1.80 | 0.93            | 0.90            | 0.024 |
| 40   | 4BVQA    | 5HWEA    | 364    | 370    | 19.5  | 19.7  | 361     | 43.8   | 1.79 | 0.94            | 0.92            | 0.011 |



| pair | ID+chain | ID+chain | length | length | Rg    | Rg    | aligned | seq.id | RMSD | TMs  | TMs  | $d_E$ |
|------|----------|----------|--------|--------|-------|-------|---------|--------|------|------|------|-------|
| No   | A        | B        | A      | B      | A (Å) | B (Å) | length  | (%)    | (Å)  | A    | B    |       |
| 41   | 1SPGB    | 1WMUB    | 147    | 146    | 15.2  | 15.1  | 146     | 51.4   | 1.01 | 0.95 | 0.96 | 0.024 |
| 42   | 5WS7A    | 5OTNA    | 156    | 156    | 15.3  | 15.1  | 156     | 69.9   | 1.40 | 0.94 | 0.94 | 0.017 |
| 43   | 1YARH    | 5LE5K    | 203    | 201    | 16.6  | 16.6  | 199     | 28.6   | 2.04 | 0.91 | 0.92 | 0.022 |
| 44   | 4O6RA    | 5EKCA    | 489    | 484    | 24.2  | 24.6  | 480     | 33.3   | 1.31 | 0.96 | 0.97 | 0.020 |
| 45   | 3NGJA    | 1UB3A    | 218    | 211    | 16.4  | 16.2  | 211     | 43.6   | 0.89 | 0.94 | 0.98 | 0.021 |
| 46   | 3FW9A    | 5D79A    | 495    | 498    | 22.4  | 22.5  | 487     | 42.5   | 1.82 | 0.94 | 0.94 | 0.014 |
| 47   | 4YIOA    | 1XUQA    | 202    | 200    | 16.6  | 16.5  | 198     | 57.6   | 0.95 | 0.95 | 0.96 | 0.019 |
| 48   | 3W9SA    | 1ZH2A    | 116    | 120    | 13.0  | 13.1  | 115     | 40.9   | 0.98 | 0.94 | 0.91 | 0.023 |
| 49   | 4F40A    | 4MHBA    | 280    | 274    | 18.1  | 18.3  | 260     | 45.8   | 1.00 | 0.91 | 0.93 | 0.022 |
| 50   | 4IO1A    | 6EIPA    | 218    | 218    | 17.4  | 17.2  | 217     | 53.0   | 1.07 | 0.96 | 0.96 | 0.024 |
| 51   | 4KX4A    | 3IR4A    | 217    | 211    | 17.3  | 17.5  | 211     | 84.8   | 0.61 | 0.96 | 0.99 | 0.016 |
| 52   | 5O0DA    | 3NBKA    | 157    | 158    | 15.5  | 15.5  | 157     | 78.3   | 1.39 | 0.95 | 0.94 | 0.024 |
| 53   | 1ZUWA    | 2DWUA    | 261    | 265    | 17.9  | 18.0  | 259     | 52.9   | 1.14 | 0.96 | 0.95 | 0.020 |
| 54   | 2CYGA    | 1AQ0A    | 312    | 306    | 18.9  | 18.6  | 306     | 55.2   | 0.89 | 0.96 | 0.98 | 0.016 |
| 55   | 1CS1A    | 3ACZA    | 383    | 386    | 21.9  | 21.9  | 377     | 35.8   | 1.55 | 0.95 | 0.94 | 0.014 |
| 56   | 4KC7A    | 3LV4A    | 449    | 431    | 21.8  | 21.5  | 424     | 56.4   | 0.97 | 0.93 | 0.97 | 0.024 |
| 57   | 3JU8A    | 4KNAA    | 480    | 487    | 24.3  | 24.7  | 480     | 60.0   | 0.71 | 0.99 | 0.98 | 0.024 |
| 58   | 2V3ZA    | 5WZEA    | 439    | 442    | 25.3  | 25.2  | 438     | 49.3   | 1.32 | 0.98 | 0.97 | 0.018 |
| 59   | 5T5XA    | 4MLPC    | 470    | 492    | 24.1  | 24.2  | 470     | 79.1   | 1.31 | 0.98 | 0.94 | 0.025 |
| 60   | 1JD1A    | 1X25A    | 126    | 126    | 13.7  | 14.0  | 125     | 40.8   | 1.12 | 0.94 | 0.94 | 0.023 |
| 61   | 4HM8B    | 2BMOB    | 192    | 194    | 18.1  | 18.4  | 192     | 77.6   | 0.80 | 0.98 | 0.97 | 0.016 |
| 62   | 1ARBA    | 4NSVA    | 263    | 264    | 16.5  | 16.6  | 263     | 77.9   | 0.44 | 0.99 | 0.99 | 0.016 |
| 63   | 4EIEA    | 1GDVA    | 82     | 85     | 11.7  | 11.7  | 82      | 39.0   | 0.74 | 0.96 | 0.92 | 0.024 |
| 64   | 2BFDB    | 1UMDB    | 332    | 323    | 19.8  | 19.6  | 322     | 46.3   | 0.89 | 0.95 | 0.98 | 0.022 |
| 65   | 3E7PA    | 3KKZA    | 253    | 251    | 18.3  | 18.2  | 245     | 71.8   | 1.15 | 0.94 | 0.95 | 0.017 |
| 66   | 2C7SA    | 3I36A    | 289    | 286    | 19.0  | 18.5  | 281     | 42.0   | 1.63 | 0.93 | 0.94 | 0.021 |
| 67   | 4YETA    | 3H1SA    | 198    | 190    | 16.1  | 16.3  | 190     | 47.9   | 1.23 | 0.92 | 0.96 | 0.022 |
| 68   | 2ZBXA    | 3ABAA    | 399    | 397    | 21.1  | 21.0  | 392     | 43.6   | 2.10 | 0.92 | 0.93 | 0.018 |
| 69   | 4WEOA    | 5T5QA    | 238    | 237    | 17.0  | 17.3  | 233     | 34.3   | 1.90 | 0.91 | 0.91 | 0.024 |
| 70   | 1WU4A    | 5YXTA    | 374    | 379    | 19.3  | 19.2  | 372     | 75.8   | 0.69 | 0.99 | 0.97 | 0.025 |
| 71   | 5V0ZC    | 2P2OA    | 189    | 184    | 17.2  | 16.9  | 184     | 42.4   | 1.08 | 0.94 | 0.96 | 0.024 |
| 72   | 4AK9A    | 3B9QA    | 302    | 298    | 21.2  | 21.6  | 294     | 69.7   | 1.30 | 0.94 | 0.95 | 0.024 |
| 73   | 5AOVA    | 2DBQA    | 334    | 327    | 22.4  | 22.5  | 327     | 84.7   | 0.48 | 0.97 | 0.99 | 0.024 |
| 74   | 1H5QA    | 1GEEA    | 260    | 261    | 18.2  | 18.3  | 251     | 29.9   | 1.52 | 0.92 | 0.91 | 0.020 |
| 75   | 5VN5B    | 6DXSA    | 332    | 342    | 19.1  | 19.4  | 324     | 35.5   | 1.66 | 0.93 | 0.90 | 0.019 |
| 76   | 3UWCA    | 3NYTA    | 362    | 359    | 21.6  | 20.5  | 350     | 32.6   | 1.75 | 0.91 | 0.92 | 0.024 |
| 77   | 6DXBA    | 3OITA    | 388    | 367    | 21.0  | 20.6  | 366     | 54.1   | 1.20 | 0.92 | 0.97 | 0.018 |
| 78   | 4DNXA    | 1JHDA    | 396    | 396    | 21.9  | 21.8  | 396     | 80.8   | 0.78 | 0.99 | 0.99 | 0.018 |
| 79   | 5XAOA    | 4RSLA    | 431    | 436    | 21.7  | 21.8  | 429     | 72.3   | 1.06 | 0.98 | 0.97 | 0.024 |
| 80   | 1DM5A    | 2ZHJA    | 315    | 315    | 21.5  | 21.6  | 314     | 47.5   | 1.25 | 0.97 | 0.97 | 0.019 |
| 81   | 2OSAA    | 5IRCB    | 196    | 195    | 16.6  | 16.6  | 191     | 36.6   | 1.77 | 0.90 | 0.91 | 0.018 |

| pair | ID+chain | ID+chain | length | length | Rg    | Rg    | aligned | seq.id | RMSD | TMs  | TMs  | $d_E$ |
|------|----------|----------|--------|--------|-------|-------|---------|--------|------|------|------|-------|
| No   | A        | B        | A      | B      | A (Å) | B (Å) | length  | (%)    | (Å)  | A    | B    |       |
| 82   | 2PFYA    | 2PFZA    | 295    | 301    | 18.9  | 18.9  | 294     | 42.5   | 0.96 | 0.97 | 0.96 | 0.021 |
| 83   | 1XE0A    | 4N8MA    | 108    | 108    | 14.4  | 14.3  | 106     | 80.2   | 1.30 | 0.94 | 0.94 | 0.024 |
| 84   | 4E98A    | 2NUHA    | 110    | 104    | 15.8  | 14.5  | 104     | 32.7   | 0.90 | 0.90 | 0.95 | 0.024 |
| 85   | 2INCB    | 3GE3B    | 322    | 304    | 21.6  | 22.4  | 302     | 60.6   | 0.88 | 0.92 | 0.98 | 0.019 |
| 86   | 1MI3A    | 5Z6UA    | 319    | 318    | 19.1  | 19.2  | 316     | 74.1   | 0.93 | 0.98 | 0.98 | 0.023 |
| 87   | 5JGYA    | 2BGSA    | 306    | 308    | 18.9  | 18.9  | 306     | 88.2   | 0.49 | 0.99 | 0.99 | 0.023 |
| 88   | 2D5KA    | 1JIGA    | 148    | 146    | 15.7  | 15.6  | 146     | 50.7   | 0.54 | 0.97 | 0.99 | 0.016 |
| 89   | 2IWXA    | 6CJIA    | 214    | 214    | 17.1  | 17.0  | 213     | 87.3   | 0.55 | 0.99 | 0.99 | 0.012 |
| 90   | 1RURH    | 1KCVH    | 218    | 217    | 21.4  | 21.1  | 214     | 55.1   | 1.66 | 0.91 | 0.91 | 0.023 |
| 91   | 5EWOA    | 3QSQA    | 213    | 216    | 16.8  | 17.1  | 213     | 53.1   | 0.82 | 0.98 | 0.97 | 0.021 |
| 92   | 4UPIA    | 4UPLA    | 547    | 555    | 25.6  | 27.3  | 530     | 54.7   | 1.60 | 0.94 | 0.93 | 0.022 |
| 93   | 2C0RB    | 6CZXA    | 361    | 361    | 20.9  | 21.4  | 360     | 47.8   | 1.28 | 0.97 | 0.97 | 0.022 |
| 94   | 1MTZA    | 3WMRA    | 290    | 296    | 18.2  | 18.2  | 290     | 27.9   | 1.59 | 0.95 | 0.93 | 0.015 |
| 95   | 5J8NA    | 2JC4A    | 258    | 256    | 17.3  | 17.0  | 250     | 27.6   | 1.76 | 0.90 | 0.91 | 0.022 |
| 96   | 3WC3A    | 2XFGA    | 435    | 446    | 20.4  | 20.8  | 426     | 43.9   | 1.57 | 0.95 | 0.93 | 0.016 |
| 97   | 4JCPA    | 2CMTA    | 170    | 164    | 14.4  | 14.4  | 163     | 70.6   | 0.68 | 0.94 | 0.98 | 0.025 |
| 98   | 5ICEA    | 6I73A    | 351    | 353    | 23.3  | 22.8  | 339     | 36.0   | 1.80 | 0.91 | 0.91 | 0.020 |
| 99   | 2OX4A    | 2GL5A    | 393    | 401    | 20.6  | 20.7  | 392     | 51.3   | 1.19 | 0.98 | 0.96 | 0.014 |
| 100  | 4UO0A    | 4FNKA    | 325    | 318    | 31.5  | 28.9  | 318     | 83.6   | 0.75 | 0.97 | 0.99 | 0.012 |

PDB ID code and chain ID code (ID+chain) for structural homologs A and B in the high TM-score benchmark set. The structures have TM-scores (TMs)  $> 0.9$ , ZC shape descriptor (ZCD) Euclidean distance  $d_E < 0.025$ , chain-length (length) and radius of gyration (Rg) difference  $< 10\%$ .

**Table S4: Protein structures in the low TM-score benchmark set**

| pair | ID+chain | ID+chain | length | length | Rg    | Rg    | aligned | seq.    | RMSD | TM <sub>s</sub> | TM <sub>s</sub> | $d_E$ |
|------|----------|----------|--------|--------|-------|-------|---------|---------|------|-----------------|-----------------|-------|
| No   | A        | B        | A      | B      | A (Å) | B (Å) | length  | id. (%) | (Å)  | A               | B               |       |
| 1    | 1R8NA    | 3IHWA    | 185    | 167    | 15.6  | 14.9  | 96      | 11.5    | 5.84 | 0.27            | 0.29            | 0.023 |
| 2    | 2ZYZB    | 3VP5A    | 183    | 185    | 17.6  | 18.5  | 100     | 7.0     | 6.21 | 0.27            | 0.27            | 0.022 |
| 3    | 3BX4A    | 5N07A    | 132    | 137    | 16.8  | 17.5  | 52      | 3.8     | 4.61 | 0.24            | 0.23            | 0.022 |
| 4    | 2ZPMA    | 1UCRA    | 79     | 74     | 12.1  | 11.8  | 43      | 7.0     | 4.12 | 0.28            | 0.29            | 0.024 |
| 5    | 5MOKA    | 2HO1A    | 208    | 219    | 20.3  | 21.1  | 91      | 1.1     | 6.01 | 0.25            | 0.24            | 0.025 |
| 6    | 3ZS3A    | 2VYOA    | 222    | 206    | 16.8  | 16.6  | 99      | 5.1     | 5.67 | 0.26            | 0.27            | 0.021 |
| 7    | 1YWFA    | 3HHIA    | 241    | 258    | 16.9  | 17.7  | 105     | 8.6     | 5.70 | 0.26            | 0.25            | 0.024 |
| 8    | 1MGQA    | 5D4SA    | 74     | 70     | 12.5  | 11.8  | 33      | 3.0     | 3.05 | 0.28            | 0.29            | 0.021 |
| 9    | 5URPA    | 3C37A    | 201    | 217    | 17.2  | 17.4  | 90      | 8.9     | 5.75 | 0.26            | 0.25            | 0.025 |
| 10   | 4BF5A    | 3G5BA    | 396    | 383    | 24.2  | 24.1  | 158     | 8.2     | 7.43 | 0.22            | 0.23            | 0.024 |
| 11   | 5HXLA    | 5MKWB    | 123    | 117    | 15.9  | 15.6  | 66      | 6.1     | 4.91 | 0.28            | 0.29            | 0.023 |
| 12   | 1GV9A    | 3P8AA    | 223    | 245    | 16.1  | 17.4  | 122     | 5.7     | 6.29 | 0.29            | 0.28            | 0.024 |
| 13   | 5XMZA    | 3IU5A    | 122    | 114    | 14.4  | 14.6  | 53      | 11.3    | 5.04 | 0.23            | 0.24            | 0.023 |
| 14   | 2PEZA    | 2O99A    | 176    | 170    | 15.7  | 15.6  | 93      | 10.8    | 5.64 | 0.28            | 0.29            | 0.024 |
| 15   | 3FANA    | 2GFNA    | 192    | 190    | 17.1  | 18.1  | 108     | 4.6     | 6.02 | 0.30            | 0.30            | 0.023 |
| 16   | 5O9WA    | 1VKNA    | 356    | 331    | 20.6  | 19.9  | 155     | 7.7     | 6.72 | 0.26            | 0.27            | 0.020 |
| 17   | 3CNUA    | 4HPLA    | 110    | 113    | 14.7  | 15.3  | 62      | 8.1     | 5.42 | 0.27            | 0.26            | 0.024 |
| 18   | 1WHIA    | 6BEVA    | 122    | 113    | 13.9  | 13.4  | 58      | 8.6     | 5.40 | 0.23            | 0.24            | 0.025 |
| 19   | 3E0EA    | 6J6VA    | 89     | 94     | 12.5  | 12.6  | 42      | 7.1     | 4.64 | 0.24            | 0.23            | 0.021 |
| 20   | 3C3JA    | 4QTCA    | 361    | 330    | 20.4  | 20.3  | 161     | 6.8     | 7.36 | 0.24            | 0.26            | 0.023 |
| 21   | 3VPGA    | 5X5OA    | 310    | 291    | 19.8  | 19.6  | 145     | 11.0    | 6.15 | 0.29            | 0.30            | 0.024 |
| 22   | 3P85A    | 5BY8A    | 224    | 221    | 16.9  | 18.1  | 97      | 7.2     | 6.20 | 0.24            | 0.24            | 0.019 |
| 23   | 4YS6A    | 1MNNA    | 313    | 290    | 20.2  | 20.3  | 135     | 3.7     | 6.47 | 0.25            | 0.27            | 0.025 |
| 24   | 1AZ5A    | 4A8XA    | 95     | 88     | 13.6  | 13.3  | 56      | 8.9     | 4.92 | 0.28            | 0.29            | 0.024 |
| 25   | 2DURA    | 6QWOA    | 251    | 252    | 17.7  | 17.4  | 122     | 5.7     | 6.61 | 0.26            | 0.26            | 0.024 |
| 26   | 5F86A    | 5N7QA    | 365    | 337    | 21.5  | 20.0  | 159     | 5.7     | 6.54 | 0.27            | 0.28            | 0.021 |
| 27   | 6CW3G    | 2P1MA    | 92     | 90     | 18.1  | 19.2  | 49      | 2.0     | 5.29 | 0.24            | 0.24            | 0.023 |
| 28   | 3JS4A    | 5M6QA    | 207    | 224    | 16.8  | 17.8  | 119     | 5.0     | 6.49 | 0.30            | 0.28            | 0.023 |
| 29   | 4I0WA    | 3L7HA    | 91     | 86     | 13.1  | 13.3  | 52      | 7.7     | 4.70 | 0.27            | 0.27            | 0.025 |
| 30   | 3PXXA    | 3HISA    | 282    | 257    | 18.0  | 18.1  | 129     | 6.2     | 6.74 | 0.25            | 0.27            | 0.025 |
| 31   | 1EVLA    | 3FK4A    | 401    | 388    | 24.5  | 23.3  | 174     | 5.7     | 7.05 | 0.25            | 0.26            | 0.025 |
| 32   | 4XTBA    | 2VPKA    | 109    | 115    | 14.8  | 14.2  | 59      | 6.8     | 5.34 | 0.24            | 0.23            | 0.024 |
| 33   | 6EKKA    | 2YXXA    | 375    | 375    | 21.5  | 22.5  | 162     | 7.4     | 7.22 | 0.24            | 0.24            | 0.023 |
| 34   | 1VCHA    | 3EFYA    | 168    | 183    | 16.1  | 16.7  | 81      | 6.2     | 5.29 | 0.29            | 0.27            | 0.025 |
| 35   | 2RJ2A    | 6R1HA    | 185    | 184    | 17.3  | 16.9  | 78      | 6.4     | 6.03 | 0.22            | 0.22            | 0.023 |
| 36   | 3FUCA    | 6AE9A    | 274    | 251    | 18.3  | 18.0  | 132     | 9.1     | 6.41 | 0.27            | 0.29            | 0.022 |
| 37   | 1T5IA    | 1VKBA    | 159    | 147    | 15.1  | 14.5  | 66      | 10.6    | 5.13 | 0.25            | 0.26            | 0.023 |
| 38   | 3G3TA    | 1WF3A    | 274    | 296    | 20.3  | 19.9  | 119     | 4.2     | 5.75 | 0.28            | 0.26            | 0.024 |
| 39   | 2PIIA    | 1BUOA    | 112    | 121    | 17.1  | 16.3  | 49      | 4.1     | 3.97 | 0.26            | 0.25            | 0.024 |
| 40   | 5F6QA    | 2ONFA    | 140    | 137    | 17.4  | 17.8  | 69      | 7.2     | 5.15 | 0.28            | 0.28            | 0.024 |

| pair | ID+chain | ID+chain | length | length | Rg    | Rg    | aligned | seq.    | RMSD | TMs  | TMs  | $d_E$ |
|------|----------|----------|--------|--------|-------|-------|---------|---------|------|------|------|-------|
| No   | A        | B        | A      | B      | A (Å) | B (Å) | length  | id. (%) | (Å)  | A    | B    |       |
| 41   | 6U54B    | 5GJYB    | 95     | 100    | 14.9  | 14.2  | 45      | 4.4     | 4.07 | 0.26 | 0.25 | 0.025 |
| 42   | 5EU0B    | 2Z7FI    | 55     | 50     | 11.5  | 11.5  | 27      | 0.0     | 3.87 | 0.23 | 0.24 | 0.025 |
| 43   | 3A8GA    | 4GUNA    | 195    | 205    | 19.3  | 17.9  | 99      | 5.1     | 5.83 | 0.28 | 0.27 | 0.024 |
| 44   | 4AUCA    | 3QJ3A    | 323    | 319    | 19.9  | 20.0  | 141     | 6.4     | 6.57 | 0.26 | 0.26 | 0.025 |
| 45   | 1LLNA    | 1FX4A    | 248    | 231    | 18.3  | 17.5  | 106     | 8.5     | 6.40 | 0.24 | 0.25 | 0.021 |
| 46   | 1DL5A    | 3PVDA    | 317    | 299    | 21.0  | 20.4  | 145     | 4.1     | 7.11 | 0.25 | 0.26 | 0.019 |
| 47   | 4ZJHA    | 1U02A    | 208    | 222    | 19.0  | 18.2  | 94      | 4.3     | 6.02 | 0.24 | 0.23 | 0.022 |
| 48   | 2SGAA    | 2FCRA    | 181    | 173    | 14.3  | 14.7  | 86      | 7.0     | 5.08 | 0.29 | 0.30 | 0.024 |
| 49   | 5NCRB    | 1XHDA    | 174    | 169    | 15.6  | 15.6  | 76      | 3.9     | 5.01 | 0.27 | 0.28 | 0.024 |
| 50   | 3KEPA    | 6OE6A    | 140    | 127    | 16.4  | 15.2  | 74      | 5.4     | 5.35 | 0.27 | 0.28 | 0.025 |
| 51   | 5K8CA    | 6DGMB    | 358    | 382    | 20.4  | 20.6  | 155     | 7.1     | 6.96 | 0.25 | 0.24 | 0.024 |
| 52   | 2H7ZA    | 6BN0A    | 75     | 79     | 13.1  | 13.1  | 42      | 14.3    | 4.15 | 0.28 | 0.28 | 0.023 |
| 53   | 3BIOA    | 3BL9A    | 280    | 286    | 21.1  | 21.6  | 114     | 7.0     | 6.11 | 0.24 | 0.24 | 0.024 |
| 54   | 5M2YA    | 5D3XB    | 130    | 141    | 14.1  | 15.3  | 60      | 5.0     | 4.52 | 0.28 | 0.26 | 0.024 |
| 55   | 2P7SA    | 5AYQB    | 110    | 121    | 13.7  | 14.7  | 57      | 5.3     | 4.70 | 0.29 | 0.27 | 0.018 |
| 56   | 4R37A    | 1MRZA    | 255    | 266    | 20.2  | 21.3  | 116     | 9.5     | 6.06 | 0.27 | 0.26 | 0.024 |
| 57   | 5NJOA    | 4NWYA    | 121    | 128    | 14.4  | 15.4  | 62      | 6.5     | 5.38 | 0.25 | 0.24 | 0.021 |
| 58   | 4IYKA    | 5E5LA    | 207    | 190    | 18.8  | 18.0  | 107     | 9.3     | 6.09 | 0.28 | 0.29 | 0.023 |
| 59   | 2F62A    | 3KBYA    | 151    | 138    | 17.0  | 16.2  | 75      | 5.3     | 5.38 | 0.27 | 0.28 | 0.022 |
| 60   | 3EQCA    | 3D4PA    | 312    | 307    | 19.8  | 19.5  | 142     | 6.3     | 6.22 | 0.28 | 0.29 | 0.023 |
| 61   | 3BQ9A    | 4CQBA    | 446    | 402    | 21.8  | 21.2  | 212     | 6.6     | 7.31 | 0.28 | 0.30 | 0.024 |
| 62   | 6EVNA    | 2V6UA    | 95     | 103    | 13.1  | 13.8  | 47      | 2.1     | 4.16 | 0.28 | 0.27 | 0.021 |
| 63   | 4OVSA    | 4FE3A    | 300    | 291    | 19.7  | 18.9  | 143     | 7.7     | 6.50 | 0.28 | 0.28 | 0.022 |
| 64   | 3O5NA    | 4MNOA    | 100    | 95     | 13.7  | 13.0  | 58      | 6.9     | 4.95 | 0.28 | 0.29 | 0.021 |
| 65   | 6HIUB    | 5GVDA    | 143    | 153    | 15.5  | 15.9  | 72      | 6.9     | 5.31 | 0.26 | 0.25 | 0.021 |
| 66   | 2WEIA    | 1LC0A    | 278    | 290    | 19.9  | 19.9  | 147     | 10.9    | 6.71 | 0.29 | 0.28 | 0.022 |
| 67   | 4N5MA    | 5Z37A    | 246    | 246    | 17.7  | 17.4  | 117     | 0.9     | 6.04 | 0.27 | 0.27 | 0.025 |
| 68   | 5L8LA    | 1E7WA    | 263    | 267    | 19.2  | 18.5  | 121     | 5.0     | 5.51 | 0.30 | 0.29 | 0.023 |
| 69   | 4LUNU    | 2E8VA    | 311    | 292    | 23.6  | 22.0  | 138     | 5.1     | 6.37 | 0.26 | 0.27 | 0.023 |
| 70   | 1PWAA    | 1MVOA    | 123    | 121    | 13.4  | 13.2  | 72      | 11.1    | 5.38 | 0.29 | 0.29 | 0.021 |
| 71   | 4Y2LA    | 1TFEA    | 147    | 142    | 17.7  | 18.0  | 66      | 7.6     | 5.12 | 0.25 | 0.26 | 0.025 |
| 72   | 3ZBVA    | 2OR7A    | 118    | 107    | 14.2  | 13.6  | 50      | 10.0    | 4.26 | 0.26 | 0.28 | 0.023 |
| 73   | 4LHSA    | 1IG0A    | 329    | 317    | 20.3  | 20.7  | 143     | 7.0     | 6.62 | 0.26 | 0.27 | 0.025 |
| 74   | 6MX6C    | 3K7IB    | 143    | 157    | 14.8  | 14.9  | 82      | 3.7     | 5.84 | 0.27 | 0.26 | 0.024 |
| 75   | 2GJ3A    | 2QHQA    | 119    | 111    | 14.5  | 14.0  | 66      | 10.6    | 5.74 | 0.25 | 0.26 | 0.023 |
| 76   | 5WCJA    | 4DOOA    | 222    | 203    | 17.4  | 16.9  | 96      | 9.4     | 5.88 | 0.25 | 0.26 | 0.025 |
| 77   | 3MVCA    | 3K9WA    | 157    | 163    | 15.8  | 15.8  | 79      | 13.9    | 5.19 | 0.27 | 0.26 | 0.024 |
| 78   | 2V2PA    | 1ZK5A    | 170    | 172    | 18.1  | 17.0  | 83      | 3.6     | 5.80 | 0.26 | 0.26 | 0.023 |
| 79   | 2RDQA    | 1RO7A    | 265    | 255    | 17.6  | 17.8  | 120     | 3.3     | 6.44 | 0.25 | 0.26 | 0.024 |
| 80   | 1U6RA    | 3AUPA    | 380    | 377    | 21.9  | 21.4  | 180     | 10.6    | 7.01 | 0.28 | 0.28 | 0.025 |
| 81   | 5A2DA    | 2P3YA    | 493    | 447    | 24.7  | 24.1  | 196     | 3.1     | 7.48 | 0.24 | 0.25 | 0.023 |

| pair | ID+chain | ID+chain | length | length | Rg    | Rg    | aligned | seq.    | RMSD | TM <sub>s</sub> | TM <sub>s</sub> | $d_E$ |
|------|----------|----------|--------|--------|-------|-------|---------|---------|------|-----------------|-----------------|-------|
| No   | A        | B        | A      | B      | A (Å) | B (Å) | length  | id. (%) | (Å)  | A               | B               |       |
| 82   | 6RLTB    | 2UY1A    | 456    | 438    | 28.7  | 31.1  | 188     | 4.3     | 6.39 | 0.27            | 0.28            | 0.023 |
| 83   | 3VZ9B    | 6QZLA    | 103    | 103    | 15.2  | 14.3  | 56      | 7.1     | 4.93 | 0.29            | 0.29            | 0.024 |
| 84   | 1DUVG    | 6T2WA    | 333    | 304    | 19.3  | 19.4  | 140     | 3.6     | 7.00 | 0.23            | 0.25            | 0.025 |
| 85   | 1MBMA    | 3GMFA    | 198    | 196    | 17.2  | 17.0  | 100     | 6.0     | 6.00 | 0.28            | 0.28            | 0.024 |
| 86   | 5M9NA    | 1O63A    | 202    | 200    | 18.7  | 19.4  | 103     | 9.7     | 6.13 | 0.27            | 0.27            | 0.023 |
| 87   | 4JEMA    | 5EWYA    | 157    | 165    | 14.7  | 15.7  | 80      | 2.5     | 5.44 | 0.28            | 0.27            | 0.024 |
| 88   | 4NYHA    | 5JBLA    | 182    | 165    | 15.9  | 15.9  | 79      | 10.1    | 5.49 | 0.25            | 0.27            | 0.025 |
| 89   | 5K6DA    | 1DSZA    | 77     | 75     | 11.9  | 11.7  | 43      | 11.6    | 4.15 | 0.29            | 0.29            | 0.024 |
| 90   | 4WF5A    | 5LT5A    | 188    | 204    | 16.8  | 16.8  | 86      | 7.0     | 4.79 | 0.30            | 0.28            | 0.024 |
| 91   | 1X8BA    | 3FUCA    | 259    | 274    | 18.9  | 18.3  | 116     | 6.9     | 6.08 | 0.27            | 0.26            | 0.022 |
| 92   | 1GWYA    | 1D4OA    | 175    | 177    | 14.9  | 15.1  | 89      | 2.2     | 5.60 | 0.29            | 0.28            | 0.020 |
| 93   | 3BQ9A    | 2QN0A    | 446    | 429    | 21.8  | 21.9  | 201     | 5.0     | 7.02 | 0.28            | 0.28            | 0.021 |
| 94   | 2SAKA    | 2O16A    | 121    | 132    | 15.8  | 16.3  | 63      | 7.9     | 4.81 | 0.27            | 0.26            | 0.020 |
| 95   | 3FD5A    | 2X3EA    | 339    | 325    | 19.6  | 18.9  | 175     | 7.4     | 7.14 | 0.29            | 0.30            | 0.023 |
| 96   | 4ATMA    | 3MVSA    | 221    | 210    | 31.9  | 29.1  | 87      | 5.7     | 5.29 | 0.24            | 0.25            | 0.017 |
| 97   | 2WSBA    | 1Y4JA    | 254    | 266    | 18.0  | 17.8  | 101     | 5.9     | 6.28 | 0.23            | 0.22            | 0.025 |
| 98   | 2XLGA    | 6AVXA    | 229    | 208    | 16.8  | 15.7  | 99      | 7.1     | 5.31 | 0.28            | 0.30            | 0.024 |
| 99   | 4HJIA    | 6NLFE    | 154    | 156    | 16.6  | 17.1  | 72      | 5.6     | 5.10 | 0.27            | 0.27            | 0.015 |
| 100  | 3PVIA    | 1SS4A    | 156    | 143    | 18.1  | 17.3  | 71      | 4.2     | 4.93 | 0.26            | 0.28            | 0.018 |

PDB ID code and chain ID code (ID+chain) for shape homologs A and B in the low TM-score benchmark set. The structures have TM-scores (TMs)  $< 0.3$ , ZC shape descriptor (ZCD) Euclidean distance  $d_E < 0.025$ , chain-length (length) and radius of gyration (Rg) difference  $< 10\%$ .

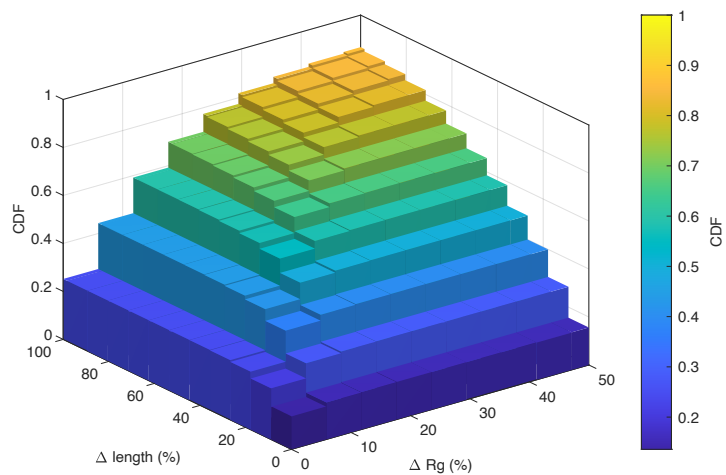

**Figure S4.** 2D cumulative distribution function (CDF) for the percent difference in residue length and radius of gyration ( $R_g$ ) for shape matches in the S2 set.

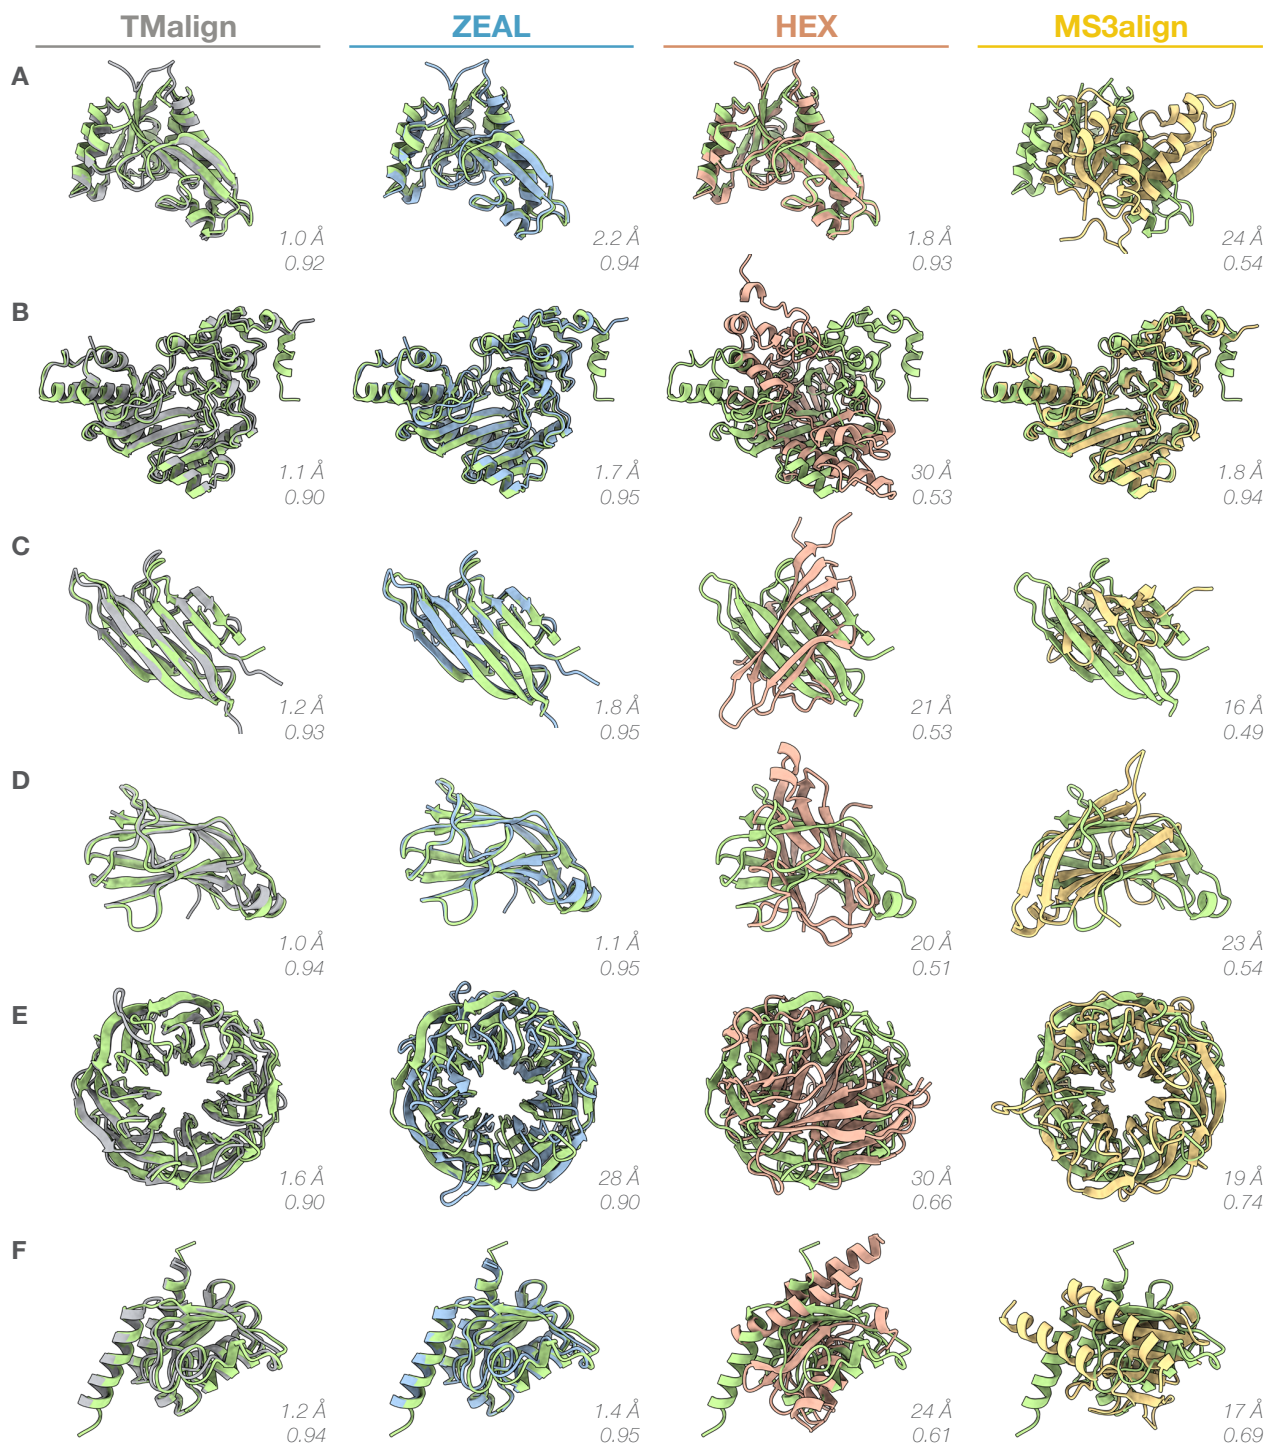

**Figure S5.** Six alignments computed by TM-align, ZEAL, HEX and MS3Align from the high TM-score benchmark set. The  $C_{\alpha}$  RMSD<sub>TM</sub> and the ZEAL score for each alignment is also shown. A) 3AV3-A (green) & 3P9X-A B) 1U6RA (green) & 3JPZA C) 1O91A (green) & 6U66A D) 4G9S-B (green) & 4DY5-A E) 3SCY-A (green) & 6IGB-A F) 1WWR-A (green) & 2B3J-A.

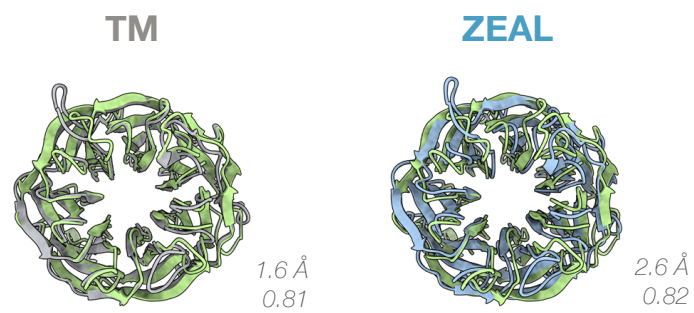

**Figure S6.** Alignment of 3SCY-A (green) and 6IGB-A using TM-align and ZEAL with ZC moments up to order 30. The  $C_{\alpha}$  RMSD<sub>TM</sub> and the ZEAL score for each alignment is also shown.



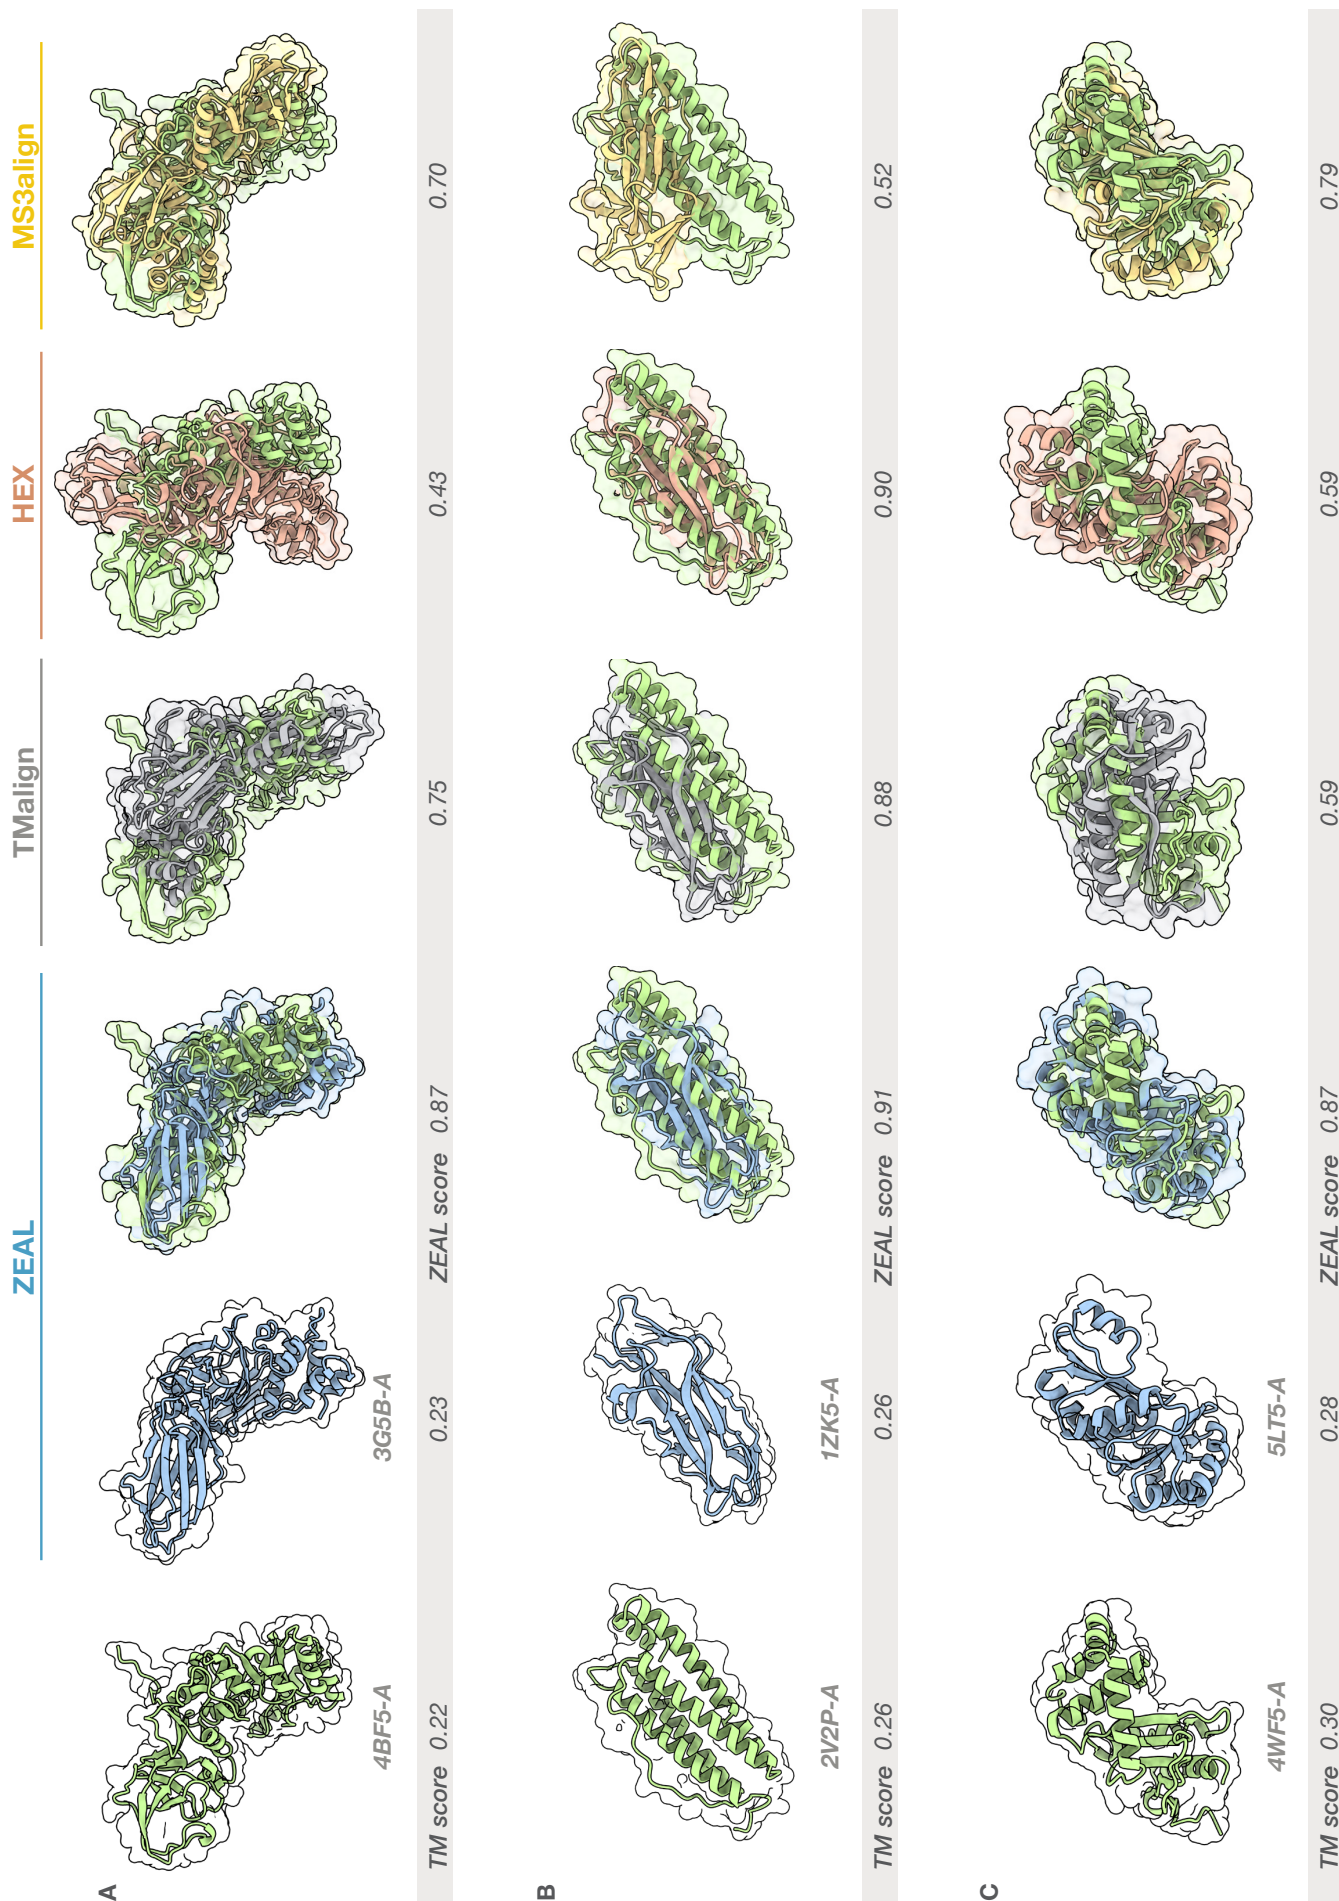

Figure S7 A-C. Superpositions from the low TM-score benchmark set.

ZEAL

TMalign

HEX

MS3align

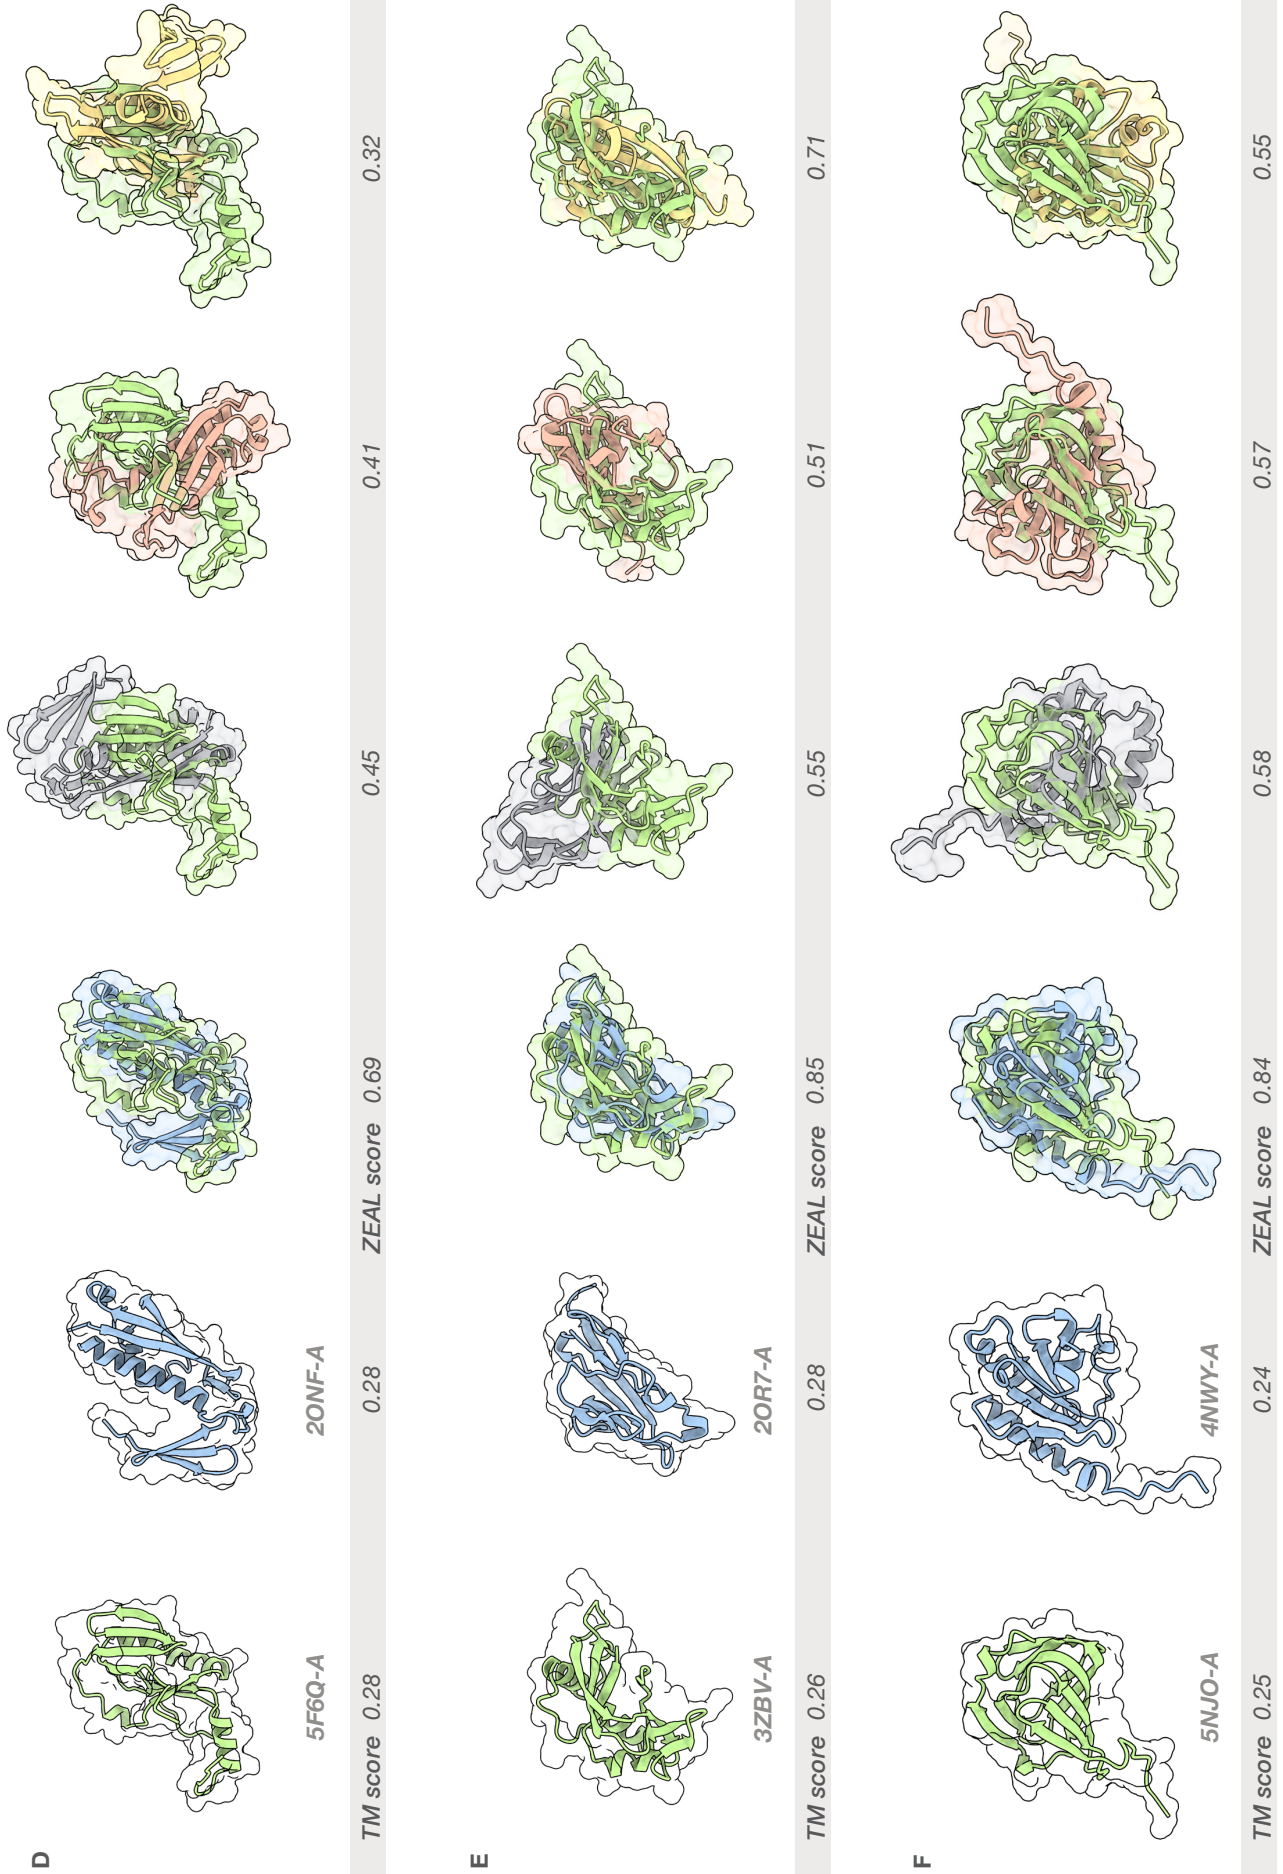

Figure S7 D-F. Superpositions from the low TM-score benchmark set.

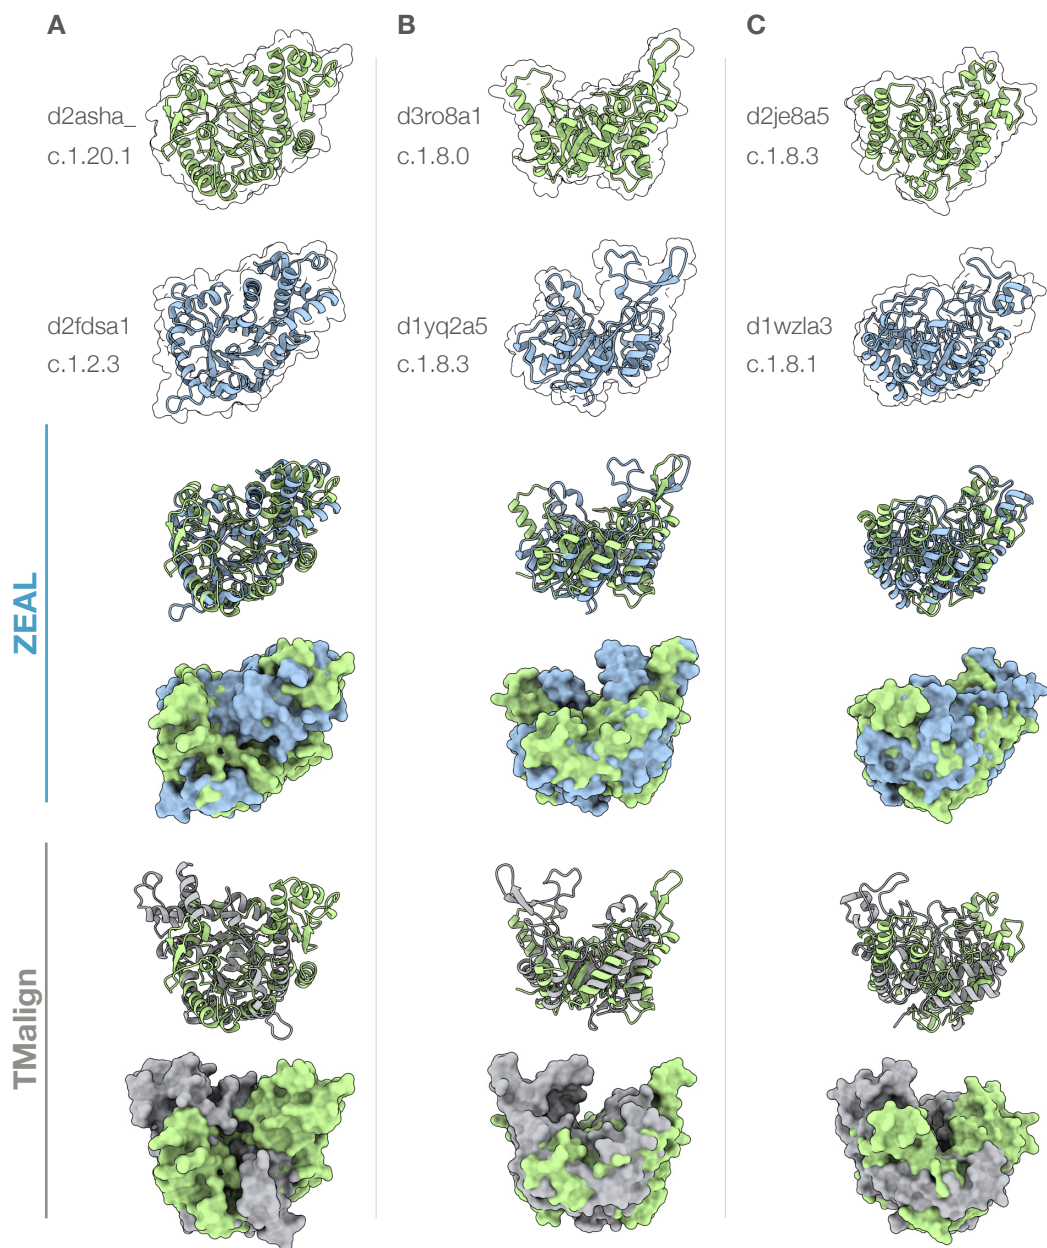

**Figure S8.** Examples of TIM-barrel proteins from the SCOPe (2.07-2021-01-20) database [2] where shape-alignments can be used to compare the relative placement of structural elements on the outside of the central beta-barrel. The labels left of each protein denotes the stable domain identifier (sid) and the SCOPe concise classification string (sccs).

**Table S5. Benchmark statistics for the high TM-score data set**

|                                  | <b>TMalign</b> | <b>ZEAL</b> | <b>HEX</b>   | <b>MS3Align<sup>b</sup></b> |
|----------------------------------|----------------|-------------|--------------|-----------------------------|
| mean (std) RMSD <sup>a</sup> (Å) | 1.25 (0.44)    | 1.97 (2.67) | 10.67 (13.1) | 11.26 (11.71)               |
| median RMSD <sup>a</sup> (Å)     | 1.25           | 1.70        | 2.08         | 3.07                        |
| mean (std) ZEAL score            | 0.94 (0.03)    | 0.96 (0.02) | 0.80 (0.21)  | 0.79 (0.20)                 |
| median ZEAL score                | 0.95           | 0.96        | 0.93         | 0.91                        |

<sup>a</sup>RMSD computed using the same corresponding residues as those from TMalign.

<sup>b</sup>MS3Align crashed for 20 % of the alignments and data for these are omitted in the statistics.

**Table S6. Benchmark statistics for the low TM-score data set**

|                                  | <b>TMalign</b> | <b>ZEAL</b>  | <b>HEX</b>   | <b>MS3Align<sup>b</sup></b> |
|----------------------------------|----------------|--------------|--------------|-----------------------------|
| mean (std) RMSD <sup>a</sup> (Å) | 5.81 (0.89)    | 21.13 (8.55) | 22.06 (7.34) | 22.19 (6.35)                |
| median RMSD <sup>a</sup> (Å)     | 5.81           | 20.44        | 21.60        | 21.27                       |
| mean (std) ZEAL score            | 0.62 (0.10)    | 0.81 (0.04)  | 0.56 (0.15)  | 0.60 (0.11)                 |
| median ZEAL score                | 0.63           | 0.81         | 0.55         | 0.60                        |

<sup>a</sup>RMSD computed using the same corresponding residues as those from TMalign.

<sup>b</sup>MS3Align crashed for 16 % of the alignments and data for these are omitted in the statistics.

### S3.1. Order and scaling dependence

The performance of ZEAL depends on the expansion order. Figure S9 shows  $C_\alpha$  RMSD distributions for the high TM-score set obtained from TM-align and ZEAL using moments computed up to order 6, 20 and 30 and with the same residue mapping as that of TM-align. Summarizing statistics are shown in table S7. Using order 30 results in a slight improvement in performance compared to order 20; 94 % of the alignments have RMSD within 1 Å from those obtained using TM-align when moments up to order 30 are used, compared to 90 % using moments up to order 20. However, this comes at a much higher computational cost. Using low expansion orders results in faster alignments, but comes at the expense of worse performance; 57 % of the alignments have RMSD within 1 Å from those obtained using TM-align. As a trade-off between accuracy and computational speed, the default expansion order in ZEAL is set to 20.

In contrast to the expansion order, the alignment performance is much less sensitive to the scaling factor used in the normalization step required for the moment computations. Figure S10 shows  $C_\alpha$  RMSD distributions for the high TM-score set obtained from TM-align and ZEAL, where protein surfaces are scaled such that the maximum distance from the geometric center,  $R_{\max}$ , corresponds to 70, 80 and 90 % of the unit sphere radius. Summarizing statistics are shown in table S8. At least for the scaling factors studied here, the performance is essentially the same. However, the shape matching performance from ZC shape descriptors are likely more sensitive to the type of normalization scheme employed.

**Table S7. Benchmark statistics for the high TM-score data set:  
ZEAL order dependence**

|                                  | TMalign     | order 6     | order 20    | order 30    |
|----------------------------------|-------------|-------------|-------------|-------------|
| mean (std) RMSD <sup>a</sup> (Å) | 1.25 (0.44) | 3.75 (5.93) | 1.97 (2.67) | 1.91 (2.64) |
| median RMSD <sup>a</sup> (Å)     | 1.25        | 2.14        | 1.70        | 1.61        |

<sup>a</sup>RMSD computed using the same corresponding residues as those from TMalign.

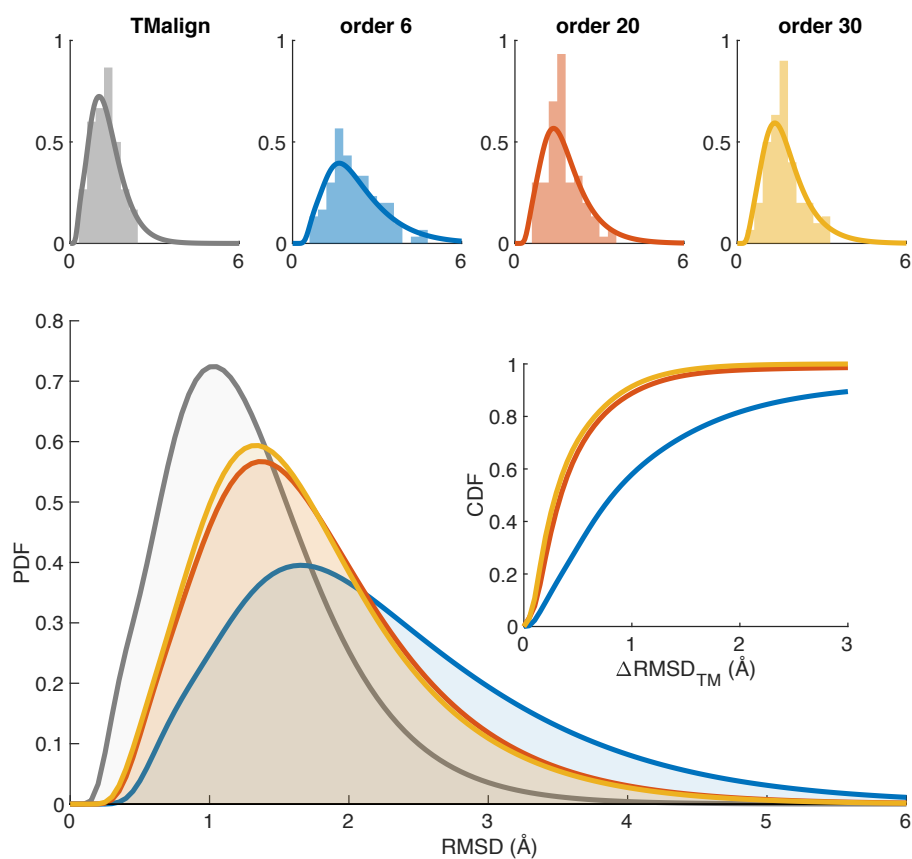

**Figure S9.** Benchmark results for the high TM-score data set using moment-expansions up to order 6, 20 and 30 in ZEAL. The probability density functions (PDF) of the backbone  $C_{\alpha}$  RMSD were computed using the residue mapping from TM-align. The PDFs were estimated (kernel density) from the corresponding histograms shown individually for TMalign and each order used in ZEAL (top). The inset shows the associated cumulative distribution function (CDF) for the RMSD difference relative TM-align.

**Table S8. Benchmark statistics for the high TM-score data set:  
ZEAL scaling dependence**

|                                  | TMalign     | $0.7 \cdot R_{\max}$ | $0.8 \cdot R_{\max}$ | $0.9 \cdot R_{\max}$ |
|----------------------------------|-------------|----------------------|----------------------|----------------------|
| mean (std) RMSD <sup>a</sup> (Å) | 1.25 (0.44) | 1.97 (2.68)          | 1.97 (2.68)          | 1.80 (1.38)          |
| median RMSD <sup>a</sup> (Å)     | 1.25        | 1.69                 | 1.67                 | 1.64                 |

<sup>a</sup>RMSD computed using the same corresponding residues as those from TMalign.

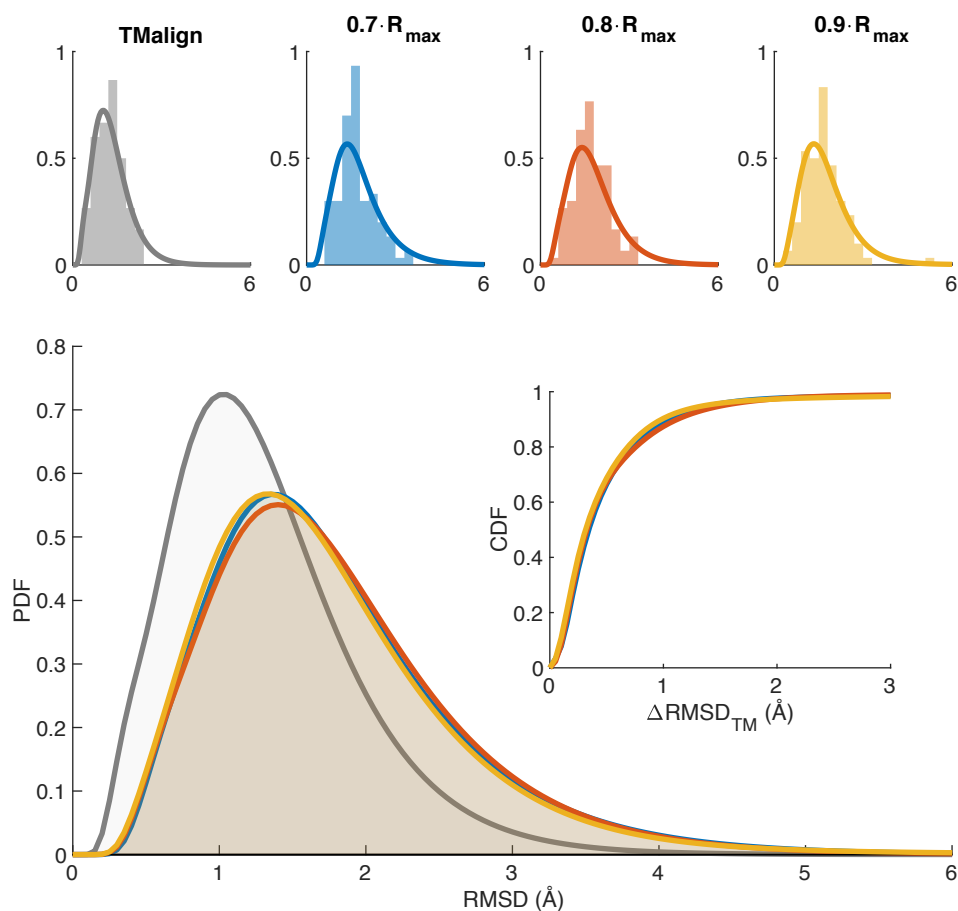

**Figure S10.** Benchmark results for the high TM-score data set using different scaling factors for the object normalization step. The protein surfaces are scaled such that the maximum distance from the geometric center,  $R_{\max}$ , corresponds to 70, 80 and 90 % of the unit sphere radius. The probability density functions (PDF) of the backbone  $C_{\alpha}$  RMSD were computed using the residue mapping from TMalign. The PDFs were estimated (kernel density) from the corresponding histograms shown individually for TMalign and each scaling factor used in ZEAL (top). The inset shows the associated cumulative distribution function (CDF) for the RMSD difference relative TMalign.

## S4. Coupling of shape and function

Figure S11 below shows the alignment from TM-align and ZEAL of two transferases with similar shape (PDB ID codes 5AN1 and 3UAW) that share 22 % sequence identity as determined by BLAST (query coverage 43 % and E-value 0.001). Without more information, it is difficult to say which alignment is biologically relevant and that captures the evolutionary relatedness, if any.

In general, we would like to probe the coupling between shape and function of two proteins, beyond sequence and secondary structure, as this could be the manifestation of divergent or convergent evolution. To do this, we start with the  $S1$  data set with  $N_{S1} = 18,965$  single-chain protein structures. As a proxy for function, we use the keyword (KW) annotations for each structure from UniprotKB[5]. We then form the  $S1p$  set containing all  $N_{S1}(N_{S1} - 1)/2$  unique and non-identical pairs of proteins from the  $S1$  set, and find the subset  $A1$  which have similar shape and the subset  $A2$  which have structures that are not similar. We determine the degree of shape similarity by computing the Euclidean distance of the ZCDs and find the  $N_{A1} = 161,490$  pairs with distance  $< 0.025$  - an empirically determined cut-off for structures having similar shape. As a proxy for structural similarity, we compute the TM-score for each pair in  $S1p$  using TM-align (Version 20190818)[7] and find the  $N_{A2} = 138,214,921$  pairs with TM-score  $< 0.3$ . We then construct the set  $A$  which is the intersection of set  $A1$  and  $A2$ ; these  $N_A = 103,276$  pairs thus have similar shape and different secondary structures.

We define the following two events:

**A:** Two protein structures have similar shape, but are structurally dissimilar.

**B:** Two proteins are annotated with the same keyword

and the corresponding probabilities

$$P(A) = N_A \left( \frac{N_{S1}(N_{S1} - 1)}{2} \right)^{-1} \quad (0.1)$$

$$P(B) = \frac{N_{KW}}{N_{S1}} \cdot \frac{N_{KW} - 1}{N_{S1} - 1} \quad (0.2)$$

If A and B are independent then

$$\kappa = \frac{P(A \cap B)}{P(A)P(B)} \quad (0.3)$$

will be equal to 1, where  $P(A \cap B)$  is the joint probability of having a pair with similar shape, different secondary structure (as probed by the TM-score) and similar function (as probed by keywords).



Our hypothesis is that shape alone is independent from function, so we define

$$H_0 : \frac{P(A \cap B)}{P(A)P(B)} = 1 \quad (0.4)$$

$$H_1 : \frac{P(A \cap B)}{P(A)P(B)} > 1 \quad (0.5)$$

where  $H_0$  is the null hypothesis and  $H_1$  is the alternative hypothesis, i.e. that protein global shape intrinsically carries information about protein function. A significance test of  $\kappa$ , for a given KW, is performed using a permutation test. This is a resampling method where a permutation distribution - approximating the sampling distribution - is created consistent under the null hypothesis, that is, the distribution of  $\kappa$  due to the randomness in selecting our S1 sample data set. From the permutation distribution we then locate our observed  $\kappa$  and compute the P-value. This is the probability, if  $H_0$  is true, that we would observe a value as extreme or more extreme than the one we did observe.

The permutation distribution is created by repeatedly computing  $\kappa$  from a permutation resample where the keyword annotations have been randomly reshuffled among the structures in the S1 set. For instance, if three proteins in the set {1 2 3\* 4 5\* 6\* 7 8 9 10} have the \* keyword in a sample, then a permutation resample could be {1\* 2 3 4 5\* 6 7 8\* 9 10}. If the permutation distribution is consistent under  $H_0$ , then it should be centered at  $\kappa=1$ . Figure S12 shows permutations distributions from  $10^5$  permutation resamples for the keywords "kinase", "calcium", "DNA-binding" and "zinc-finger".

All distributions are centered at 1 and are approximately normal. With a significance level  $\alpha = 0.1 \%$ , we cannot reject  $H_0$  for proteins having the "kinase" or "calcium" keyword. But for "DNA-binding" and "zinc-finger" proteins we have P-values  $\ll \alpha$  for which we can reject  $H_0$  in favour of  $H_1$ . Thus, for these proteins, the global shape intrinsically correlates with function (i.e. the keywords) and the  $A \cap B$  set of proteins pairs could be the result of functional convergence by evolution.

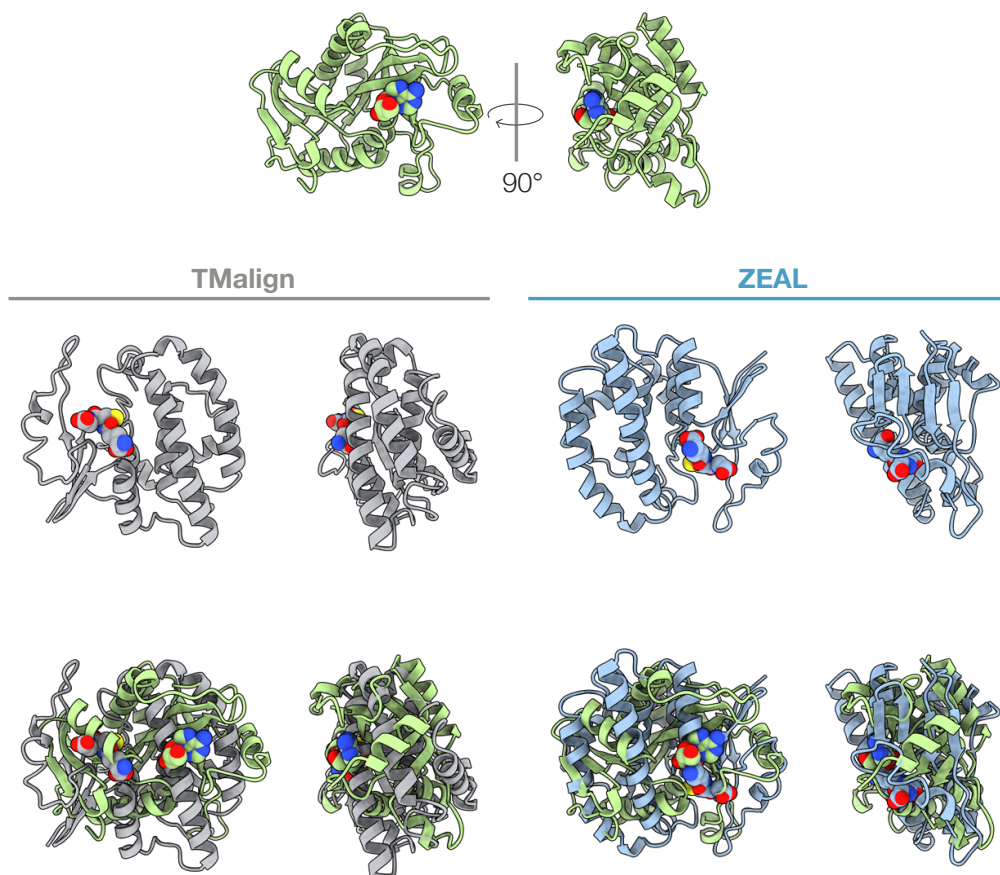

**Figure S11.** Structure and shape alignment of 4AN1 (chain A, green) and 3UAW (chain A) using TM-align (grey) and ZEAL (blue) respectively. The ligands are shown in vdW representation with carbon atoms shown in the same colour as the cartoon representations. Oxygen, nitrogen and sulphur atoms are shown in red, blue and yellow respectively.

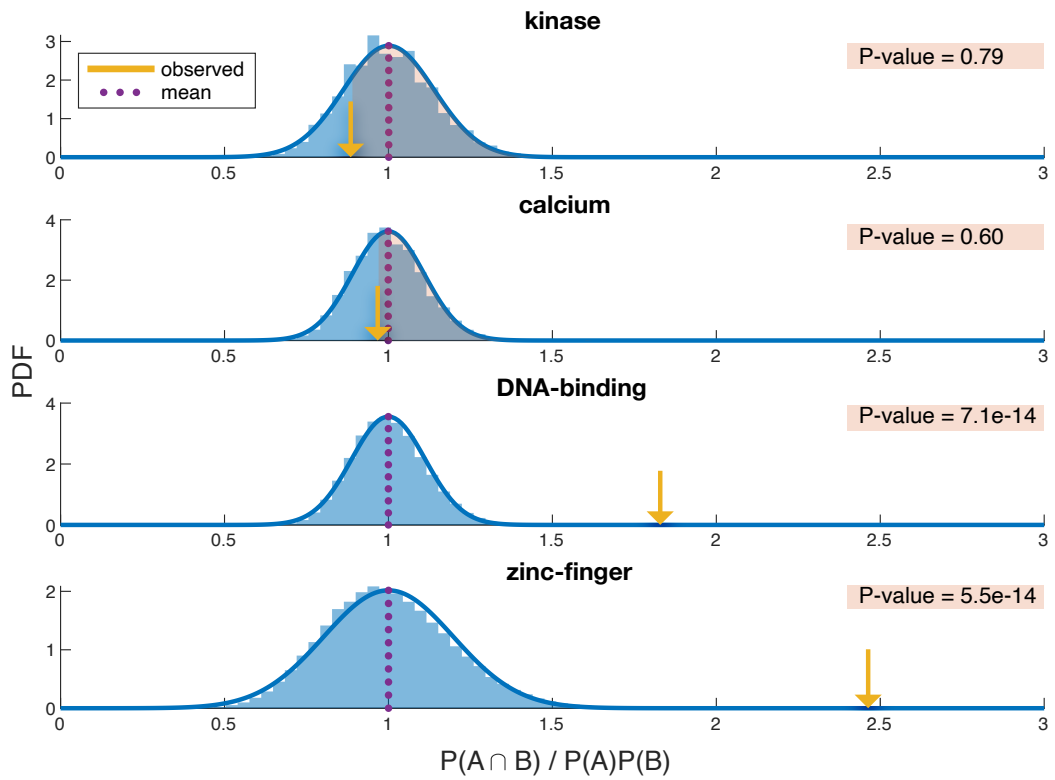

**Figure S12.** Permutation distribution of the  $\kappa$  statistic using  $10^5$  permutation resamples for the "kinase", "calcium", "DNA-binding" and "zinc-finger" keywords. The observed value in each distribution is shown by the yellow arrow together with the corresponding P-value, computed by integrating (shown as transparent red) the fitted normal distribution (blue line).

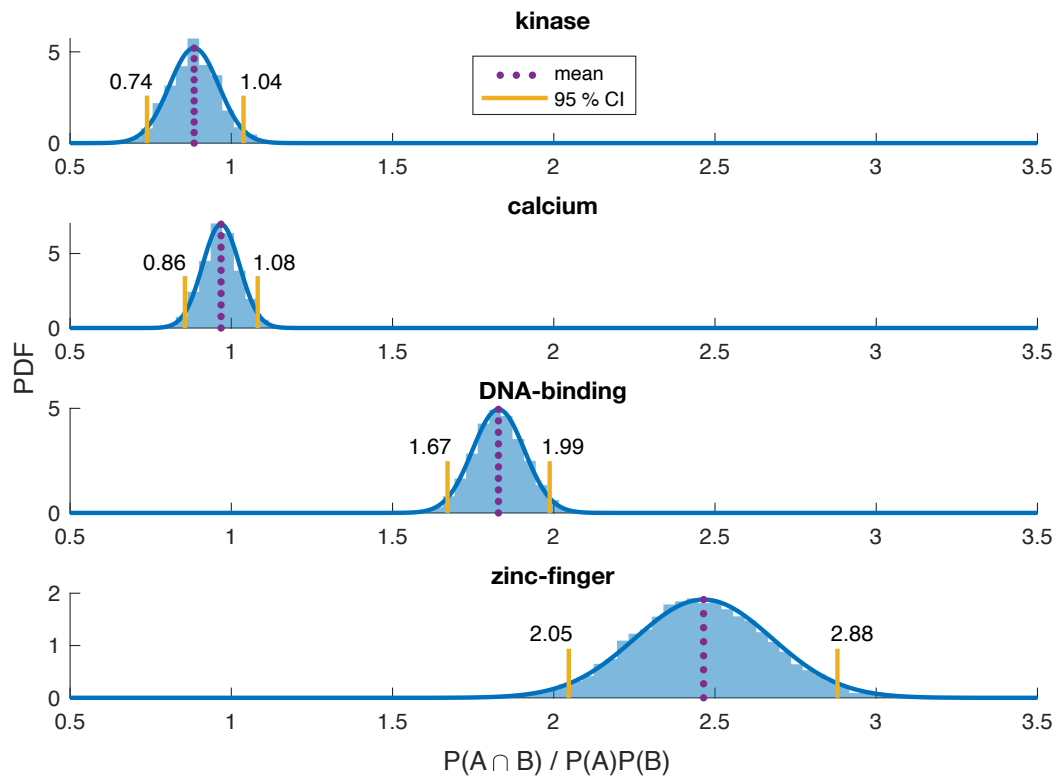

**Figure S13.** Bootstrap distribution of the  $\kappa$  statistic using  $10^4$  resamples taken (with replacement) from the S2 set. The 95 % bootstrap percentile confidence interval is shown for each distribution.

**Table S9. A selection of keywords with significant  $\kappa > 1$  .**

| keyword                            | instances <sup>a</sup> | fraction <sup>a</sup> | kappa | p-value <sup>b</sup> | 95 % CI <sup>c</sup> |      |
|------------------------------------|------------------------|-----------------------|-------|----------------------|----------------------|------|
| ribonucleoprotein                  | 120                    | 0,006                 | 4,64  | 6,44E-11             | 2,68                 | 6,83 |
| chromosome                         | 202                    | 0,011                 | 3,33  | 2,36E-12             | 2,39                 | 4,34 |
| isopeptide bond                    | 585                    | 0,031                 | 2,65  | 1,65E-25             | 2,34                 | 2,98 |
| differentiation                    | 178                    | 0,009                 | 3,54  | 1,38E-10             | 2,32                 | 4,75 |
| zinc-finger                        | 439                    | 0,023                 | 2,46  | 5,46E-14             | 2,05                 | 2,88 |
| ubl conjugation                    | 874                    | 0,046                 | 2,20  | 3,98E-28             | 2,03                 | 2,37 |
| cleavage on pair of basic residues | 142                    | 0,007                 | 3,29  | 1,18E-06             | 1,91                 | 4,87 |
| nucleus                            | 1672                   | 0,088                 | 1,99  | 9,17E-39             | 1,89                 | 2,08 |
| chromatin regulator                | 179                    | 0,009                 | 2,95  | 5,55E-07             | 1,86                 | 4,15 |
| alternative splicing               | 2144                   | 0,113                 | 1,89  | 2,57E-40             | 1,82                 | 1,97 |
| cell adhesion                      | 164                    | 0,009                 | 2,91  | 2,61E-06             | 1,82                 | 4,12 |
| hydroxylation                      | 78                     | 0,004                 | 4,66  | 5,77E-06             | 1,74                 | 8,12 |
| dna-binding                        | 984                    | 0,052                 | 1,83  | 7,08E-14             | 1,67                 | 1,99 |
| developmental protein              | 251                    | 0,013                 | 2,33  | 4,68E-06             | 1,66                 | 3,05 |
| repeat                             | 1684                   | 0,089                 | 1,73  | 2,50E-21             | 1,65                 | 1,82 |
| phosphoprotein                     | 2924                   | 0,154                 | 1,67  | 2,59E-34             | 1,62                 | 1,72 |
| transcription                      | 1007                   | 0,053                 | 1,76  | 2,22E-12             | 1,61                 | 1,91 |
| transcription regulation           | 970                    | 0,051                 | 1,75  | 1,06E-11             | 1,60                 | 1,91 |
| cell junction                      | 264                    | 0,014                 | 2,14  | 2,81E-05             | 1,52                 | 2,81 |
| lipid-binding                      | 184                    | 0,010                 | 2,33  | 1,85E-04             | 1,49                 | 3,35 |
| activator                          | 285                    | 0,015                 | 2,02  | 8,85E-05             | 1,46                 | 2,58 |
| membrane                           | 2665                   | 0,141                 | 1,45  | 1,24E-14             | 1,40                 | 1,50 |
| innate immunity                    | 183                    | 0,010                 | 2,31  | 4,61E-04             | 1,36                 | 3,35 |
| rna-binding                        | 582                    | 0,031                 | 1,60  | 1,04E-04             | 1,35                 | 1,84 |
| transmembrane                      | 1521                   | 0,080                 | 1,43  | 1,94E-07             | 1,34                 | 1,52 |
| lipoprotein                        | 495                    | 0,026                 | 1,61  | 3,68E-04             | 1,32                 | 1,91 |
| methylation                        | 345                    | 0,018                 | 1,73  | 8,90E-04             | 1,32                 | 2,17 |
| repressor                          | 309                    | 0,016                 | 1,82  | 6,21E-04             | 1,32                 | 2,34 |

<sup>a</sup> Total number of proteins in the S1 set with given keyword. <sup>b</sup> P-values computed using  $10^5$  permutation resamples from the S1 set. <sup>c</sup> 95 % bootstrap percentile confidence interval using  $10^4$  resamples (with replacement) from the S2 set.

## Section S5. ZEAL graphical user interface

The ZEAL graphical user-interface (Figure S14) showing a session of local shape-alignment of two DNA-binding proteins with PDB ID codes 4KIS (chain A, orange) and 1SKN (chain P, blue). Supplementary Figure S11 A and B show both proteins complexed with DNA. The region of interest (ROI), the zinc-ribbon domain of 4KIS (residues 270-310) that bind to DNA, is selected in a JSmol[3] window (top left). The shape-alignment search is monitored in the optimization window (top right), showing the best ZEAL score found vs. the number of iterations. The corresponding rotation of the shapes is updated in real-time in the main window (middle). The search stops when the maximum number of iterations have been completed, or when the user press a stop-button in the optimization window. The alignment before and after the search can be previewed in JSmol (bottom left and right) in the conventional ball-and-stick, van der Waals or cartoon representation. Supplementary Figure S11 shows the superposition including DNA structures.

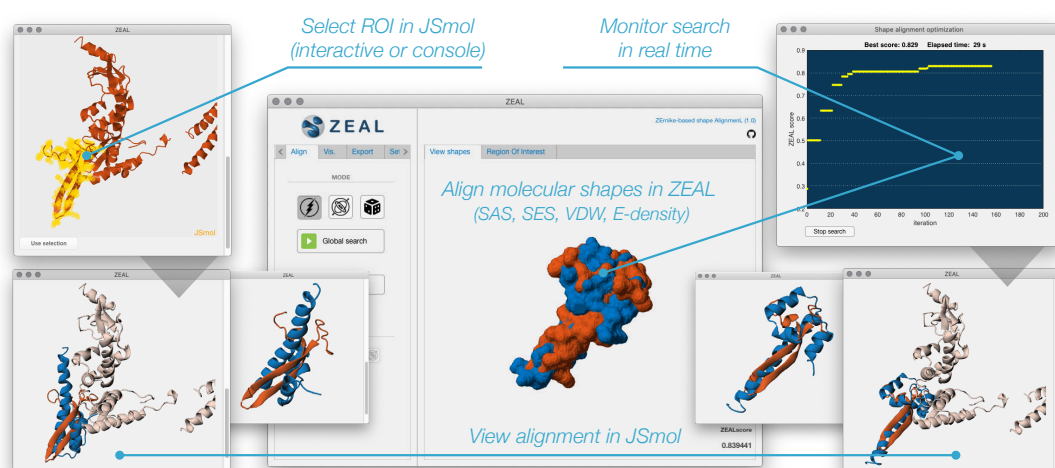

**Figure S14.** The ZEAL graphical user interface with screenshots from a local superposition session.

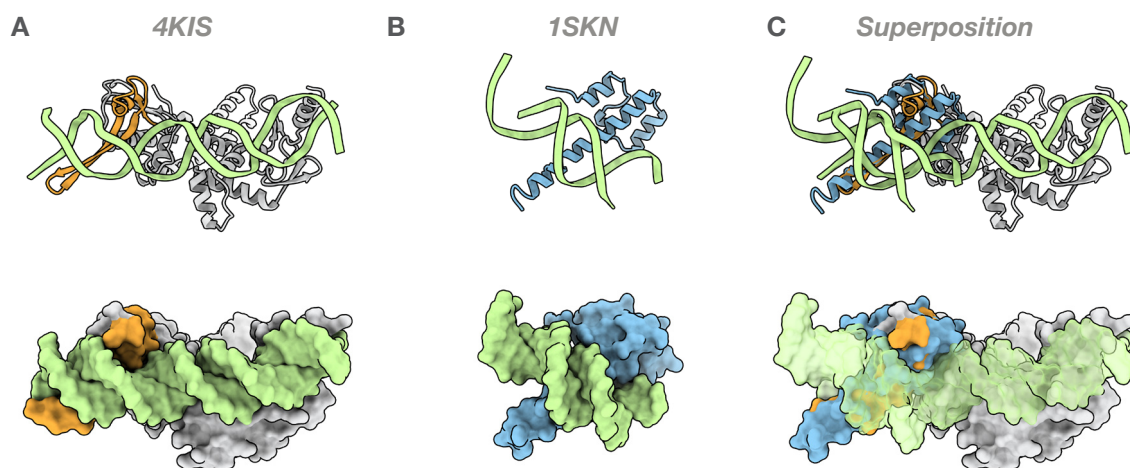

**Figure S15.** Cartoon and surface visualizations of the structures exported from ZEAL in the example shown in Figure S10. The region of interest of 4KIS is shown in orange, 1SKN is shown in blue and DNA in green.

## References

- (1) Bondi, A. *Journal of Physical Chemistry* **1964**.
- (2) Fox, N. K.; Brenner, S. E.; Chandonia, J. M. *Nucleic Acids Research* **2014**.
- (3) Hanson, R. M.; Prilusky, J.; Renjian, Z.; Nakane, T.; Sussman, J. L. *Israel Journal of Chemistry* **2013**, *53*, 207–216.
- (4) Novotni, M.; Klein, R. *Proceedings of the eighth ACM Symposium on Solid Modeling and Applications* **2003**, 216–225.
- (5) UniProt Consortium, T. *Nucleic Acids Research* **2018**, *46*, 2699–2699.
- (6) Xu, D.; Zhang, Y. *PLoS ONE* **2009**, *4*, ed. by Buehler, M. J., e8140.
- (7) Zhang, Y.; Skolnick, J. *Nucleic Acids Research* **2005**, *33*, 2302.
